# Supplementary material for: Palladium-catalyzed oxidative direct C–H/C–H cross coupling of anilides with β-keto esters
Source: Royal Society of Chemistry journal article supplement (doi:10.1039/c3cc44769c), 2013-01-01
Supplement: c3cc44769c.pdf [file c3cc44769c.pdf]

## Supporting Information

### Palladium-Catalyzed Oxidative Direct C-H/C-H Cross Coupling of Anilides with $\beta$ -Keto Esters

Wai-Wing Chan, Zhongyuan Zhou and Wing-Yiu Yu\*

*State Key Laboratory of Chirosciences and Department of Applied Biology and Chemical Technology,  
The Hong Kong Polytechnic University, Hung Hom, Kowloon, Hong Kong*

*Email: [wing-yiu.yu@polyu.edu.hk](mailto:wing-yiu.yu@polyu.edu.hk)*

#### Table of Content

|                                                                             | Page |
|-----------------------------------------------------------------------------|------|
| 1 <i>General Experimental Section</i>                                       | S2   |
| 2 <i>General Procedure and Physical Characterization</i>                    | S2   |
| 3 <i>Procedure for Cyclization Reaction of <b>2g</b> and <b>2h</b></i>      | S11  |
| 4 <i>KIE Experiment</i>                                                     | S12  |
| 5 <i>Synthesis of Cyclopalladated Complex <b>Pd-1r</b></i>                  | S13  |
| 6 <i>Stoichiometric Reaction of <b>Pd-1r</b> and Dimethyl Malonate</i>      | S13  |
| 7 <i>References</i>                                                         | S14  |
| 8 <i><math>^1\text{H}</math> and <math>^{13}\text{C}</math> NMR Spectra</i> | S15  |
| 9 <i>X-ray Crystallographic Data of <b>2c</b></i>                           | S36  |

## 1. General Experimental Section

All the reactions were performed under a nitrogen atmosphere. All the solvents were freshly distilled and dried according to the standard methods prior to use. Anilines, 1,3-dicarbonyl compounds, Pd(OAc)<sub>2</sub>, Mn(OAc)<sub>3</sub>·2H<sub>2</sub>O and trifluoroacetic acid (TFA) were obtained from commercial source. *N*-pivalanilides and *N*-acetanilides were prepared by the coupling reaction of corresponding anilines with pivaloyl or acetyl chlorides.<sup>1</sup>

Thin layer chromatography was performed on silica gel plates. Flash column chromatography was performed on silica gel (Merck, 230-400 mesh). <sup>1</sup>H and <sup>13</sup>C NMR spectra were recorded on a Bruker DPX-400 MHz spectrometer. The chemical shift (δ) values are given in ppm and are referenced to residual solvent peaks, carbon multiplicities were determined by DEPT-135 and DEPT-90 experiments. Coupling constants (*J*) were reported in hertz (Hz). Multiplicity abbreviations are: s = singlet, d = doublet, t = triplet, q = quartet, m = multiplet, dt = doublet of triplets, td = triplet of doublets, and br = broad. Mass spectra and high resolution mass spectra (HRMS) were obtained on a VG MICROMASS Fison VG platform, a Finnigan Model Mat 95 ST instrument, or a Bruker APEX 47e FT-ICR mass spectrometer. Infra-red spectra were obtained by a Bruker Vector 22 FT-IR spectrometer. Optical rotations were recorded on a Perkin-Elmer 341 polarimeter in a 10 mm cell. Melting points were measured on a BUCHI Melting Point B-545 machine. X-ray crystallographic study was performed by a Bruker CCD area detector diffractometer.

## 2. General Procedure and Physical Characterization

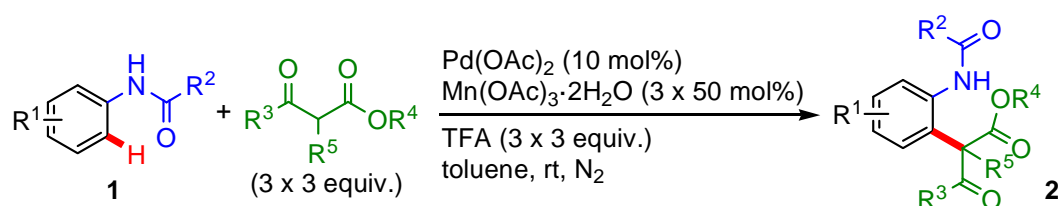

A 10 mL Schlenk test-tube (with a Quick-fit stopper and side arm) equipped with a magnetic stir bar was charged with the anilides (0.2 mmol), Pd(OAc)<sub>2</sub> (4.5 mg, 10 mol%) and Mn(OAc)<sub>3</sub>·2H<sub>2</sub>O (0.0268 g, 50 mol%). The Schlenk tube was evacuated and refilled with nitrogen for three times. Then the glass stopper was replaced by rubber septa. Dry toluene (1.5 mL), 1,3-dicarbonyl compound (0.6 mmol) and TFA (46.1 μL, 0.6 mmol) was added under a flow of nitrogen. The reaction mixture was stirred at room temperature. After 4 h, a batch of reagents [Mn(OAc)<sub>3</sub>·2H<sub>2</sub>O (50 mol%), 1,3-dicarbonyl compound (0.6 mmol), TFA (0.6 mmol)] was added to the

mixture. The batchwise addition was performed again after further 4 h. The reaction was subsequently allowed to stir for overnight. Then the reaction mixture was filtered over a plug of Celite® and then concentrated. The residue was purified by flash chromatography to give the desired product.

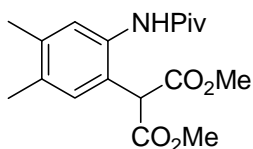

**Dimethyl 2-(4,5-dimethyl-2-(pivalamido)phenyl)malonate (2a).** Eluent: 70% *n*-hexane / 30% ethyl acetate. The product was obtained as colorless oil (85% yield). <sup>1</sup>H NMR (400 MHz, CDCl<sub>3</sub>): δ<sub>H</sub> 8.85 (s, 1H, NH), 7.55 (s, 1H, ArH), 6.96 (s, 1H, ArH), 4.58 (s, 1H, CH), 3.73 (s, 6H, 2CH<sub>3</sub>), 2.24 (s, 3H, CH<sub>3</sub>), 2.21 (s, 3H, CH<sub>3</sub>), 1.29 (s, 9H, 3 CH<sub>3</sub>). <sup>13</sup>C NMR (100 MHz, CDCl<sub>3</sub>): δ<sub>C</sub> 177.6 (C=O), 170.0 (C=O), 138.3 (C), 134.7 (C), 134.2 (C), 132.8 (CH), 128.0 (CH), 123.5 (C), 56.8 (CH<sub>3</sub>), 53.4 (CH<sub>3</sub>), 39.8 (C), 27.9 (CH), 19.9 (CH<sub>3</sub>), 19.5 (CH<sub>3</sub>). IR (neat, cm<sup>-1</sup>): 3348.2, 2971.1, 2864.3, 1739.6, 1634.5, 1571.3, 1526.7, 1150.0. HRMS (ESI): calcd. for C<sub>18</sub>H<sub>25</sub>NO<sub>5</sub>H<sup>+</sup>: 336.1811, found: 336.1802.

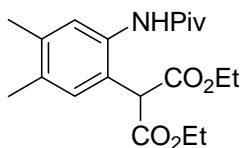

**Diethyl 2-(4,5-dimethyl-2-(pivalamido)phenyl)malonate (2b).** Eluent: 70% *n*-hexane / 30% ethyl acetate. The product was obtained as colorless oil (75% yield). <sup>1</sup>H NMR (400 MHz, CDCl<sub>3</sub>): δ<sub>H</sub> 8.91 (s, 1H, NH), 7.56 (s, 1H, ArH), 6.95 (s, 1H, ArH), 4.53 (s, 1H, CH), 4.27 – 4.19 (m, 2H, CH<sub>2</sub>), 4.17 – 4.09 (m, 2H, CH<sub>2</sub>), 2.23 (s, 3H, CH<sub>3</sub>), 2.20 (s, 3H, CH<sub>3</sub>), 1.28 (s, 9H, 3CH<sub>3</sub>), 1.24 – 1.21 (m, 6H, 2CH<sub>3</sub>). <sup>13</sup>C NMR (100 MHz, CDCl<sub>3</sub>): δ<sub>C</sub> 177.5 (C=O), 169.6 (C=O), 138.0 (C), 134.8 (C), 133.8 (C), 132.9 (CH), 127.8 (CH), 123.5 (C), 62.5 (CH<sub>2</sub>), 57.2 (CH<sub>3</sub>), 39.8 (C), 27.8 (CH<sub>3</sub>), 19.9 (CH<sub>3</sub>), 19.5 (CH<sub>3</sub>), 14.3 (CH<sub>3</sub>). IR (neat, cm<sup>-1</sup>): 3353.2, 2965.9, 2869.7, 1738.6, 1721.3, 1680.8, 1579.12, 1518.5, 1152.2. HRMS (ESI): calcd. for C<sub>20</sub>H<sub>29</sub>NO<sub>5</sub>H<sup>+</sup>: 364.2124, found: 364.2137.

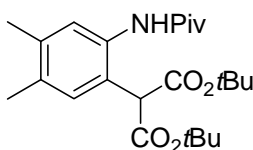

**Di-tert-butyl 2-(4,5-dimethyl-2-(pivalamido)phenyl)malonate (2c).** Eluent: 80% *n*-hexane / 20% acetone. The product was obtained as white solid (81% yield), mp

130 – 131 °C.  $^1\text{H}$  NMR (400 MHz,  $\text{CDCl}_3$ ):  $\delta_{\text{H}}$  8.96 (s, 1H, NH), 7.64 (s, 1H, ArH), 6.93 (s, 1H, ArH), 4.39 (s, 1H, CH), 2.22 (s, 3H,  $\text{CH}_3$ ), 2.20 (s, 3H,  $\text{CH}_3$ ), 1.43 (s, 18H, 2 x 3 $\text{CH}_3$ ), 1.29 (s, 9H, 3 $\text{CH}_3$ ).  $^{13}\text{C}$  NMR (100 MHz,  $\text{CDCl}_3$ ):  $\delta_{\text{C}}$  177.4 (C=O), 168.7 (C=O), 137.5 (C), 134.9 (C), 133.3 (CH), 132.9 (C), 126.8 (CH), 123.6 (C), 83.0 (C), 58.9 (CH), 39.9 (C), 28.2 ( $\text{CH}_3$ ), 27.9 ( $\text{CH}_3$ ), 19.9 ( $\text{CH}_3$ ), 19.5 ( $\text{CH}_3$ ). IR (neat,  $\text{cm}^{-1}$ ): 3362.3, 2964.5, 2850.5, 1742.5, 1646.5, 1529.3, 1433.3, 1151.2. HRMS (ESI): calcd. for  $\text{C}_{24}\text{H}_{37}\text{NO}_5\text{Na}^+$ : 442.2569, found: 442.2562.

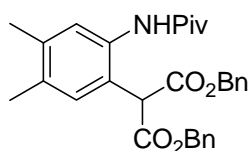

**Dibenzyl 2-(4,5-dimethyl-2-(pivalamido)phenyl)malonate (2d).** Eluent: 50% *n*-hexane / 50% diethyl ether. The product was obtained as colorless oil (94% yield).  $^1\text{H}$  NMR (400 MHz,  $\text{CDCl}_3$ ):  $\delta_{\text{H}}$  8.79 (s, 1H, NH), 7.58 (s, 1H, ArH), 7.33 – 7.29 (m, 10H), 6.96 (s, 1H, ArH), 5.26 – 5.23 (d,  $J = 12.0$  Hz, 2H,  $\text{CH}_2\text{Ph}$ ), 5.09 – 5.06 (d,  $J = 12.0$  Hz, 2H,  $\text{CH}_2\text{Ph}$ ), 4.66 (s, 1H, CH), 2.54 (s, 3H,  $\text{CH}_3$ ), 2.19 (s, 3H,  $\text{CH}_3$ ), 1.27 (s, 9H, 3 $\text{CH}_3$ ).  $^{13}\text{C}$  NMR (100 MHz,  $\text{CDCl}_3$ ):  $\delta_{\text{C}}$  177.8 (C=O), 169.2 (C=O), 138.2 (C), 135.3 (C), 134.7 (C), 134.2 (C), 132.9 (CH), 128.9 (CH), 128.8 (CH), 128.7 (CH), 127.9 (CH), 123.4 (C), 68.2 ( $\text{CH}_2$ ), 56.9 (CH), 39.8 (C), 27.8 ( $\text{CH}_3$ ), 19.9 ( $\text{CH}_3$ ), 19.5 ( $\text{CH}_3$ ). IR (neat,  $\text{cm}^{-1}$ ): 3361.2, 2961.3, 2866.5, 1739.1, 1676.5, 1517.7, 1455.6, 1148.0. HRMS (ESI): calcd. for  $\text{C}_{30}\text{H}_{33}\text{NO}_5\text{H}^+$ : 488.2437, found: 488.2461.

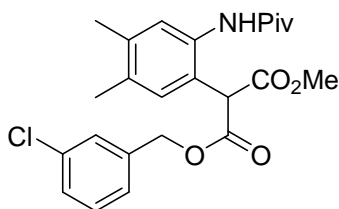

**1-(3-Chlorobenzyl) 3-methyl 2-(4,5-dimethyl-2-(pivalamido)phenyl)malonate (2e).** Eluent: 50% *n*-hexane / 50% diethyl ether. The product was obtained as colorless oil (93% yield).  $^1\text{H}$  NMR (400 MHz,  $\text{CDCl}_3$ ):  $\delta_{\text{H}}$  8.74 (s, 1H, NH), 7.54 (s, 1H, ArH), 7.28 – 7.26 (m, 3H, ArH), 7.18 – 7.16 (m, 1H, ArH), 6.97 (s, 1H, ArH), 5.23 – 5.20 (d,  $J = 12.0$  Hz, 1H,  $\text{CH}_2\text{Ph}$ ), 5.05 – 5.02 (d,  $J = 12.0$  Hz, 1H,  $\text{CH}_2\text{Ph}$ ), 4.63 (s, 1H, CH), 3.72 (s, 3H,  $\text{CH}_3$ ), 2.24 (s, 3H,  $\text{CH}_3$ ), 2.21 (s, 3H,  $\text{CH}_3$ ), 1.27 (s, 9H, 3 $\text{CH}_3$ ).  $^{13}\text{C}$  NMR (100 MHz,  $\text{CDCl}_3$ ):  $\delta_{\text{C}}$  177.6 (C=O), 169.7 (C=O), 169.3 (C=O), 138.3 (C), 137.3 (C), 134.8 (C), 134.7 (C), 134.3 (C), 132.8 (CH), 130.3 (CH), 129.0 (CH), 128.6 (CH), 128.1 (CH), 126.7 (CH), 123.4, 67.2 ( $\text{CH}_2$ ), 56.7 (CH), 53.4 ( $\text{CH}_3$ ), 39.8 (C), 27.8 ( $\text{CH}_3$ ), 19.9 ( $\text{CH}_3$ ), 19.5 ( $\text{CH}_3$ ). IR (neat,  $\text{cm}^{-1}$ ): 3367.3, 2958.4, 2866.5, 1742.5, 1676.7, 1578.5, 1517.5, 1150.8. HRMS (ESI): calcd. for  $\text{C}_{24}\text{H}_{28}\text{NO}_5\text{ClH}^+$ : 446.1734, found: 446.1727.

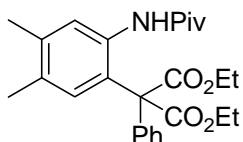

**Diethyl 2-(4,5-dimethyl-2-(pivalamido)phenyl)-2-phenylmalonate (2f).** Eluent: 70% *n*-hexane / 30% diethyl ether. The product was obtained as colorless oil (52% yield).  $^1\text{H}$  NMR (400 MHz,  $\text{CDCl}_3$ ):  $\delta_{\text{H}}$  7.62 (s, 1H, ArH), 7.42 – 7.40 (m, 3H, ArH & NH), 7.31 – 7.30 (m, 3H, ArH), 7.23 (s, 1H, ArH), 4.26 – 4.19 (m, 4H, 2 $\text{CH}_2$ ), 2.26 (s, 3H,  $\text{CH}_3$ ), 2.24 (s, 3H,  $\text{CH}_3$ ), 1.20 – 1.17 (m, 2 x 3H, 2 $\text{CH}_3$ ), 0.90 (s, 9H, 3 $\text{CH}_3$ ).  $^{13}\text{C}$  NMR (100 MHz,  $\text{CDCl}_3$ ):  $\delta_{\text{C}}$  176.5 (C=O), 170.4 (C=O), 137.6 (C), 136.9 (C), 134.4 (C), 133.4 (C), 131.2 (CH), 129.6 (CH), 128.4 (CH), 127.7 (CH), 126.8 (CH), 67.8 (C), 62.6 ( $\text{CH}_2$ ), 39.6 (C), 27.3 ( $\text{CH}_3$ ), 20.0 ( $\text{CH}_3$ ), 19.8 ( $\text{CH}_3$ ), 14.1 ( $\text{CH}_3$ ). IR (neat,  $\text{cm}^{-1}$ ): 3421.4, 2977.3, 2866.5, 1729.32, 1685.3, 1517.0, 1448.3, 1242.2, 1161.8. HRMS (ESI): calcd. for  $\text{C}_{26}\text{H}_{33}\text{NO}_5\text{H}^+$ : 440.2437, found: 440.2444.

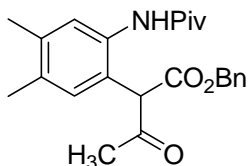

**Benzyl 2-(4,5-dimethyl-2-(pivalamido)phenyl)-3-oxobutanoate (2g).** The crude was purified by column chromatography twice. Eluent for the 1<sup>st</sup>: 70% *n*-hexane / 30% ethyl acetate. Eluent for the 2<sup>nd</sup>: 50% *n*-hexane / 50% diethyl ether. The product was obtained as colorless oil (69% yield).  $^1\text{H}$  NMR (400 MHz,  $\text{CDCl}_3$ ):  $\delta_{\text{H}}$  8.22 (s, 1H, NH), 7.58 (s, 1H, ArH), 7.37 (m, 5H, ArH), 6.98 (s, 1H, ArH), 5.32 (s, 2H,  $\text{CH}_2\text{Ph}$ ), 4.57 (s, 1H, CH), 2.24 (s, 3H,  $\text{CH}_3$ ), 2.13 (s, 3H,  $\text{CH}_3$ ), 2.09 (s, 3H,  $\text{CH}_3$ ), 1.15 (s, 9H, 3 $\text{CH}_3$ ).  $^{13}\text{C}$  NMR (100 MHz,  $\text{CDCl}_3$ ):  $\delta_{\text{C}}$  205.3 (C=O), 177.4 (C=O), 170.3 (C=O), 138.9 (C), 134.6 (C), 134.1 (C), 133.8 (C), 129.4 (CH), 129.2 (CH), 128.5 (CH), 127.5 (CH), 126.1 (C), 84.8 (C), 69.1 ( $\text{CH}_2$ ), 39.7 (C), 27.5 ( $\text{CH}_3$ ), 25.9 ( $\text{CH}_3$ ), 19.9 ( $\text{CH}_3$ ), 19.7 ( $\text{CH}_3$ ). IR (neat,  $\text{cm}^{-1}$ ): 3372.3, 3293.9, 2961.5, 2917.1, 1725.4, 1655.1, 1571.5, 1260.5. HRMS (ESI): calcd. for  $\text{C}_{24}\text{H}_{29}\text{NO}_4\text{H}^+$ : 396.2175, found: 396.2171.

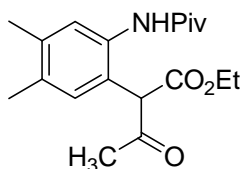

**Ethyl 2-(4,5-dimethyl-2-(pivalamido)phenyl)-3-oxobutanoate (2h).** Eluent: 70% *n*-hexane / 30% ethyl acetate. The product was obtained as colorless oil (61% yield).  $^1\text{H}$  NMR (400 MHz,  $\text{CDCl}_3$ ):  $\delta_{\text{H}}$  8.36 (s, 1H, NH), 7.59 (s, 1H, ArH), 7.23 (s, 1H, ArH), 4.57 (s, 1H, CH), 4.40 – 4.33 (m, 2H,  $\text{CO}_2\text{CH}_2$ ), 2.25 (s, 3H,  $\text{CH}_3$ ), 2.24 (s, 3H,  $\text{CH}_3$ ), 2.11 (s, 3H,  $\text{COCH}_3$ ), 1.36 – 1.33 (t,  $J = 7.2$  Hz, 3H,  $\text{CH}_3$ ), 1.23 (s, 9H, 3 $\text{CH}_3$ ).

$^{13}\text{C}$  NMR (100 MHz,  $\text{CDCl}_3$ ):  $\delta_{\text{C}}$  205.3 (C=O), 177.4 (C=O), 170.5 (C=O), 138.8 (C), 134.1 (C), 133.8 (C), 128.3 (CH), 127.5 (CH), 126.2 (C), 84.7 (C), 63.7 ( $\text{CH}_2$ ), 39.8 (CH), 27.6 ( $\text{CH}_3$ ), 25.7 ( $\text{CH}_3$ ), 19.9 ( $\text{CH}_3$ ), 19.8 ( $\text{CH}_3$ ), 14.4 ( $\text{CH}_3$ ). IR (neat,  $\text{cm}^{-1}$ ): 3345.3, 3221.1, 2961.5, 2900.3, 1608.4, 1634.1, 1491.5, 1232.5. HRMS (ESI): calcd. for  $\text{C}_{19}\text{H}_{27}\text{NO}_4\text{H}^+$ : 333.4256, found: 333.4260.

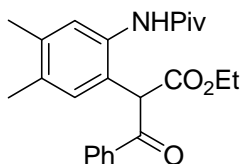

**Ethyl 2-(4,5-dimethyl-2-(pivalamido)phenyl)-3-oxo-3-phenylpropanoate (2i).**

Eluent: 50% *n*-hexane / 50% diethyl ether. The product was obtained as white solid (48% yield), mp 157 – 159 °C.  $^1\text{H}$  NMR (400 MHz,  $\text{CDCl}_3$ ):  $\delta_{\text{H}}$  13.9 (s, 0.01, enol OH), 8.60 (s, 1H, NH), 7.87 – 7.85 (d,  $J$  = 8.0 Hz, 2H, ArH), 7.53 – 7.48 (m, 2H, ArH), 7.39 – 7.35 (m, 2H, ArH), 7.04 (s, 1H, ArH), 5.47 (s, 1H, CH), 4.31 – 4.21 (m, 2H,  $\text{CH}_2$ ), 2.21 (s, 3H,  $\text{CH}_3$ ), 2.20 (s, 3H,  $\text{CH}_3$ ), 1.28 (s, 9H, 3 $\text{CH}_3$ ).  $^{13}\text{C}$  NMR (100 MHz,  $\text{CDCl}_3$ ):  $\delta_{\text{C}}$  195.3 (C=O), 177.4 (C=O), 170.5 (C=O), 138.1 (C), 135.8 (C), 135.1 (C), 134.4 (C), 134.0 (CH), 132.7 (CH), 129.3 (CH), 129.0 (CH), 127.9 (CH), 124.4 (C), 62.4 ( $\text{CH}_2$ ), 60.3 ( $\text{CH}_3$ ), 39.8 (C), 27.7 ( $\text{CH}_3$ ), 19.9 ( $\text{CH}_3$ ), 19.6 ( $\text{CH}_3$ ), 14.4 ( $\text{CH}_3$ ). IR (neat,  $\text{cm}^{-1}$ ): 3379.3, 2977.5, 2866.5, 1725.0, 1676.2, 1578.0, 1518.2, 1182.7. HRMS (ESI): calcd. for  $\text{C}_{24}\text{H}_{29}\text{NO}_4\text{H}^+$ : 396.2175, found: 396.2177.

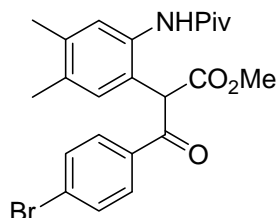

**Methyl 3-(4-bromophenyl)-2-(4,5-dimethyl-2-(pivalamido)phenyl)-3-oxopropanoate (2j).**

Eluent: 50% *n*-hexane / 50% diethyl ether. The product was obtained as white solid (51% yield), mp 165 – 167 °C.  $^1\text{H}$  NMR (400 MHz,  $\text{CDCl}_3$ ):  $\delta_{\text{H}}$  8.42 (s, 1H, NH), 7.71 – 7.69 (d,  $J$  = 8 Hz, 2H, ArH), 7.65 (s, 1H, ArH), 7.44 – 7.42 (d,  $J$  = 8 Hz, 2H, ArH), 7.18 (s, 1H, ArH), 4.88 (s, 1H, CH), 3.87 (s, 3H,  $\text{CH}_3$ ), 2.24 (s, 3H,  $\text{CH}_3$ ), 2.20 (s, 3H,  $\text{CH}_3$ ), 1.18 (s, 9H, 3 $\text{CH}_3$ ).  $^{13}\text{C}$  NMR (100 MHz,  $\text{CDCl}_3$ ):  $\delta_{\text{C}}$  194.9 (C=O), 176.7 (C=O), 172.3 (C=O), 138.9 (C), 134.2 (C), 133.7 (C), 132.4 (CH), 131.9 (CH), 131.8 (C), 129.6 (C), 128.1 (CH), 126.9 (CH), 126.1 (C), 84.6 (C), 54.5 ( $\text{CH}_3$ ), 39.8 (C), 27.6 ( $\text{CH}_3$ ), 20.0 ( $\text{CH}_3$ ), 19.8 ( $\text{CH}_3$ ). IR (neat,  $\text{cm}^{-1}$ ): 3401.9, 3251.6, 2958.8, 2917.2, 1745.8, 1717.9, 1686.8, 1661.1, 1584.5, 1518.4, 1248.9, 1177.9. HRMS (ESI): calcd. for  $\text{C}_{23}\text{H}_{25}\text{BrNO}_4\text{H}^+$ : 459.1045, found: 459.1041.

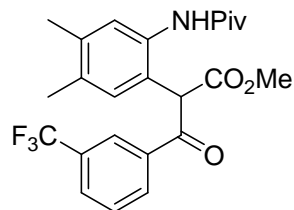

**Methyl 3-(3-(Trifluoromethyl)phenyl)-2-(4,5-dimethyl-2-(pivalamido)phenyl)-3-oxopropanoate (2k).** Eluent: 70% *n*-hexane / 30% ethyl acetate. The product was obtained as colorless oil (42% yield).  $^1\text{H}$  NMR (400 MHz,  $\text{CDCl}_3$ ):  $\delta_{\text{H}}$  8.35 (s, 1H, NH), 8.16 (s, 1H, ArH), 7.92 – 7.90 (d,  $J = 8.0$  Hz, 1H, ArH), 7.72 – 7.70 (d,  $J = 8.0$  Hz, 1H, ArH), 7.58 (s, 1H, ArH), 7.41 – 7.37 (t,  $J = 8.0$  Hz, 1H, ArH), 4.82 (s, 1H, CH), 3.92 (s, 3H,  $\text{CH}_3$ ), 2.24 (s, 3H,  $\text{CH}_3$ ), 2.23 (s, 3H,  $\text{CH}_3$ ), 1.17 (s, 9H, 3 $\text{CH}_3$ ).  $^{13}\text{C}$  NMR (100 MHz,  $\text{CDCl}_3$ ):  $\delta_{\text{C}}$  194.6 (C=O), 176.7 (C=O), 172.1 (C=O), 139.1 (C), 134.1 (CH), 134.0 (C), 133.6 (CH), 130.7 (q,  $\text{CF}_3$ ), 129.0 (CH), 127.8 (C), 127.6 (CH), 127.5 (CH), 127.2 (CH), 126.2 (C), 125.2 (C), 122.5 (C), 84.4 (CH), 54.6 ( $\text{CH}_3$ ), 39.8 (C), 27.6 ( $\text{CH}_3$ ), 19.9 ( $\text{CH}_3$ ), 19.8 ( $\text{CH}_3$ ).  $^{19}\text{F}$  NMR (376 MHz,  $\text{CDCl}_3$ ): -63.1 ( $\text{CF}_3$ ). IR (neat,  $\text{cm}^{-1}$ ): 3366.9, 2960.1, 2920.3, 1745.1, 1686.4, 1515.5, 1453.5, 1332.0, 1227.9, 1130.5. HRMS (ESI): calcd. for  $\text{C}_{24}\text{H}_{24}\text{NO}_4\text{F}_3\text{H}^+$ : 448.1736, found: 448.1739.

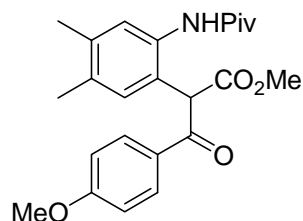

**Methyl 3-(4-methoxyphenyl)-2-(4,5-dimethyl-2-(pivalamido)phenyl)-3-oxopropanoate (2l).** The crude was purified by column chromatography twice. Eluent for the 1<sup>st</sup>: 70% *n*-hexane / 30% ethyl acetate. Eluent for the 2<sup>nd</sup>: 70% *n*-hexane / 30% acetone. The product was obtained as colorless oil (34% yield) and existed in keto:enol (~3:1) form at room temperature, which could not be separated by the column.  $^1\text{H}$  NMR (400 MHz,  $\text{CDCl}_3$ ):  $\delta_{\text{H}}$  13.87 (s, 0.04, enol OH), 8.64 (s, 1H, NH, keto- form), 8.47 (s, 0.34H, NH, enol- form), 7.87 – 7.84 (m, 2.93H, ArH, mix of keto- and enol- form) 7.71 (s, 1H, ArH, enol- form), 7.53 (s, 1H, ArH, keto- form), 7.18 (s, 1H, ArH, enol- form), 7.02 (s, 1H, ArH, keto- form), 6.85 – 6.83 (d,  $J = 8.0$  Hz, 2.15H, ArH, keto- form), 6.78 – 6.76 (d,  $J = 8.0$  Hz, 0.78H, ArH, enol- form), 5.46 (s, 1H, CH, keto-form), 4.91 (s, 0.35H, enol- form), 3.85 (s, 1.16H,  $\text{OCH}_3$ , enol-form), 3.81 (s, 3H,  $\text{OCH}_3$ , keto- form), 3.79 (s, 1.13H,  $\text{OCH}_3$ , enol- form), 3.76 (s, 3H,  $\text{OCH}_3$ , keto- form), 2.24 (s, 1.10H,  $\text{CH}_3$ , enol- form), 2.20 (s, 6H, 2 $\text{CH}_3$ , keto- form), 2.19 (s, 1.16H,  $\text{CH}_3$ , enol- form), 1.28 (s, 9H, 3 $\text{CH}_3$ , keto- form), 1.19 (s, 3.34H, 3 $\text{CH}_3$ , keto- form).  $^{13}\text{C}$  NMR (100 MHz,  $\text{CDCl}_3$ ):  $\delta_{\text{C}}$  194.5, 193.8, 177.6, 176.7, 172.6,

170.9, 164.4, 164.3, 138.6, 138.0, 135.1, 134.4, 134.3, 133.6, 133.3, 132.6, 131.8, 131.0, 128.6, 128.4, 127.9, 126.6, 126.5, 125.9, 124.8, 114.3, 113.8, 84.7, 59.6, 55.8, 55.7, 54.3, 53.2, 39.8, 27.8, 27.6, 20.0, 19.9, 19.8, 19.6. Totally 40 peaks were found in  $^{13}\text{C}$  NMR analysis; however due to the high complexity of spectrum the signal cannot be assigned. IR (neat,  $\text{cm}^{-1}$ ): 3369.1, 2958.3, 2866.5, 1736.3, 1672.3, 1600.2, 1513.2, 1259.7, 1171.6. HRMS (ESI): calcd. for  $\text{C}_{24}\text{H}_{28}\text{NO}_5\text{Na}^+$ : 434.1943, found: 434.1942.

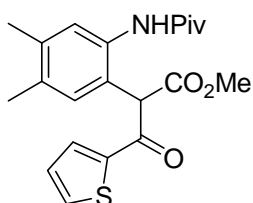

**Methyl 2-(4,5-dimethyl-2-(pivalamido)phenyl)-3-oxo-3-(thiophen-2-yl)propanoate (2m).** The crude was purified by column chromatography twice. Eluent for the 1<sup>st</sup>: 70% *n*-hexane / 30% ethyl acetate. Eluent for the 2<sup>nd</sup>: 70% *n*-hexane / 30% acetone. The product was obtained as white solid (20% yield), mp 163 – 165 °C, and existed in keto:enol (~4:1) form at room temperature, which could not be separated by the column.  $^1\text{H}$  NMR (400 MHz,  $\text{CDCl}_3$ ):  $\delta_{\text{H}}$  13.76 (s, 0.21H, enol OH), 8.78 (s, 1H, NH, keto- form), 8.15 (s, 1H, NH, enol- form), 7.61 – 7.60 (d,  $J = 4.0$  Hz, 1H, thiophen-H, keto- form), 7.57 (s, 1H, ArH, keto- form), 7.55 – 7.54 (d,  $J = 4.0$  Hz, 1H, thiophen-H, keto- form), 7.38 – 7.36 (m, 0.44H, thiophen-H & ArH, enol- form), 7.11 – 7.10 (d,  $J = 4.0$  Hz, 0.23H, thiophen-H, enol- form), 7.06 (s, 1H, ArH, keto- form), 7.03 – 7.01 (t,  $J = 4.0$  Hz, 1H, thiophen-H, keto- form), 6.93 (s, 0.22 H, ArH, enol- form), 6.91 – 6.89 (t,  $J = 4.0$  Hz, 0.23H, thiophen-H, enol- form), 5.28 (s, 1H, CH, keto- form), 3.78 (s, 3H,  $\text{CH}_3$ , keto- form), 3.74 (s, 0.74H,  $\text{CH}_3$ , enol- form), 2.33 (s, 0.69H,  $\text{CH}_3$ , enol- form), 2.24 (s, 6H, 2 $\text{CH}_3$ , keto- form), 2.22 (s, 0.78H,  $\text{CH}_3$ , enol- form), 1.26 (s, 9H, 3 $\text{CH}_3$ , keto- form), 1.10 (s, 2.09H, 3 $\text{CH}_3$ , enol- form).  $^{13}\text{C}$  NMR (100 MHz,  $\text{CDCl}_3$ ):  $\delta_{\text{C}}$  188.0 (C=O), 177.6 (C=O), 170.5 (C=O), 142.3 (C), 138.4 (C), 135.5 (CH), 135.2 (C), 134.4 (CH), 134.3 (C), 132.8 (CH), 128.7 (CH), 128.1 (CH), 124.4 (C), 61.1 (CH), 53.3 ( $\text{CH}_3$ ), 39.8 (C), 27.8 ( $\text{CH}_3$ ), 19.9 ( $\text{CH}_3$ ), 19.6 ( $\text{CH}_3$ ). In the  $^{13}\text{C}$  NMR analysis, 19 peaks were identified and assigned for the keto- form. Due to the low concentration of product with enol- form, its  $^{13}\text{C}$  NMR could not be clarified. IR (neat,  $\text{cm}^{-1}$ ): 3347.8, 2967.8, 2913.9, 1735.5, 1655.1, 1516.9, 1416.9, 1173.0. HRMS (ESI): calcd. for  $\text{C}_{21}\text{H}_{25}\text{NO}_4\text{SH}^+$ : 388.1583, found: 388.1570.



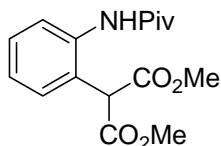

**Dimethyl 2-(2-(pivalamido)phenyl)malonate (2n).** Eluent: 70% *n*-hexane / 30% ethyl acetate. The product was obtained as yellow oil (47% yield).  $^1\text{H}$  NMR (400 MHz,  $\text{CDCl}_3$ ):  $\delta_{\text{H}}$  9.01 (s, 1H, NH), 7.81 – 7.79 (d,  $J = 8.0$  Hz, 1H, ArH), 7.38 – 7.34 (t,  $J = 8.0$  Hz, 1H, ArH), 7.22 – 7.20 (d,  $J = 8.0$  Hz, 1H, ArH), 7.15 – 7.11 (t,  $J = 8.0$  Hz, 1H, ArH), 4.65 (s, 1H, CH), 3.74 (s, 6H, 2CH<sub>3</sub>), 1.30 (s, 9H, 3CH<sub>3</sub>).  $^{13}\text{C}$  NMR (100 MHz,  $\text{CDCl}_3$ ):  $\delta_{\text{C}}$  177.7 (C=O), 169.8 (C=O), 137.4 (C), 131.9 (CH), 129.6 (CH), 126.9 (CH), 126.1 (C), 125.6 (CH), 57.2 (CH<sub>3</sub>), 53.4 (CH<sub>3</sub>), 39.9 (CH<sub>3</sub>), 27.8 (CH<sub>3</sub>). IR (neat,  $\text{cm}^{-1}$ ): 3350.2, 2960.4, 1742.5, 1721.9, 1677.9, 1566.2, 1526.8, 1477.9, 1305.7, 1150.5. HRMS (ESI): calcd. for  $\text{C}_{16}\text{H}_{21}\text{NO}_5\text{H}^+$ : 308.1498, found: 308.1483.

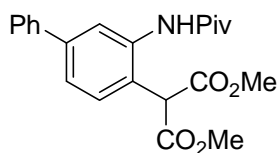

**Dimethyl 2-(4-phenyl-2-(pivalamido)phenyl)malonate (2o).** Eluent: 70% *n*-hexane / 30% ethyl acetate. The product was obtained as white solid (63% yield), mp 135 – 136 °C.  $^1\text{H}$  NMR (400 MHz,  $\text{CDCl}_3$ ):  $\delta_{\text{H}}$  9.11 (s, 1H, NH), 8.10 (s, 1H, ArH), 7.62 – 7.60 (d,  $J = 8.0$  Hz, 2H, ArH), 7.43 – 7.39 (t,  $J = 8.0$  Hz, 2H, ArH), 7.37 – 7.33 (t,  $J = 8.0$  Hz, 1H, ArH), 7.28 – 7.26 (d,  $J = 8.0$  Hz, 2H, ArH), 4.70 (s, 1H, CH), 3.78 (s, 6H, 2CH<sub>3</sub>), 1.33 (s, 9H, 3CH<sub>3</sub>).  $^{13}\text{C}$  NMR (100 MHz,  $\text{CDCl}_3$ ):  $\delta_{\text{C}}$  177.8 (C=O), 169.8 (C=O), 142.8 (C), 140.4 (C), 137.7 (C), 132.3 (CH), 129.0 (CH), 128.0 (CH), 127.7 (CH), 125.5 (CH), 124.7 (C), 124.1 (CH), 56.9 (CH), 53.6 (CH<sub>3</sub>), 40.0 (CH<sub>3</sub>), 27.9 (CH<sub>3</sub>). IR (neat,  $\text{cm}^{-1}$ ): 3369.9, 2961.5, 2875.9, 1735.9, 1723.7, 1682.8, 1592.0, 1517.2, 1480.2, 1167.2. HRMS (ESI): calcd. for  $\text{C}_{22}\text{H}_{25}\text{NO}_5\text{H}^+$ : 384.1811, found: 384.1796.

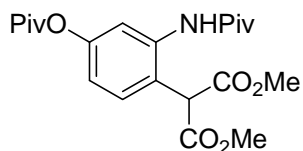

**Dimethyl 2-(2-(pivalamido)-4-(pivaloyloxy)phenyl)malonate (2p).** Eluent: 70% *n*-hexane / 30% ethyl acetate. The product was obtained as white solid (25% yield), mp 126 – 128 °C.  $^1\text{H}$  NMR (400 MHz,  $\text{CDCl}_3$ ):  $\delta_{\text{H}}$  9.18 (s, 1H, NH), 7.66 (s, 1H, ArH), 7.20 – 7.18 (d,  $J = 8.0$  Hz, 1H, ArH), 6.88 – 6.86 (d,  $J = 8.0$  Hz, 1H, ArH), 4.64 (s, 1H, CH), 3.74 (s, 6H, 2CH<sub>3</sub>), 1.33 (s, 9H, 3CH<sub>3</sub>), 1.29 (s, 9H, 3CH<sub>3</sub>).  $^{13}\text{C}$  NMR (100 MHz,  $\text{CDCl}_3$ ):  $\delta_{\text{C}}$  177.7 (C=O), 177.1 (C=O), 169.6 (CH), 151.9 (C), 138.6 (C),

132.6 (CH), 122.7 (C), 119.4 (CH), 118.6 (CH), 56.8 (CH), 53.5 (CH<sub>3</sub>), 40.0 (C), 39.5 (C), 27.8 (CH<sub>3</sub>), 27.5 (CH<sub>3</sub>). IR (neat, cm<sup>-1</sup>): 3320.3, 2953.2, 2912.2, 1740.5, 1710.2, 1670.2, 1541.4, 1482.3, 1146.3. HRMS (ESI): calcd. for C<sub>21</sub>H<sub>28</sub>NO<sub>7</sub>H<sup>+</sup>: 430.1842, found: 430.1833.

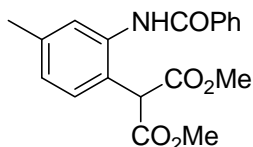

**Dimethyl 2-(2-(benzamido)-4-methylphenyl)malonate (2q).** Eluent: 70% *n*-hexane / 30% ethyl acetate. The product was obtained as white solid (60% yield), mp 133 – 135 °C. <sup>1</sup>H NMR (400 MHz, CDCl<sub>3</sub>): δ<sub>H</sub> 9.69 (s, 1H, NH), 8.00 – 7.98 (d, *J* = 8.0 Hz, 2H, ArH), 7.54 (m, 3H, ArH), 7.16 – 7.14 (d, *J* = 8.0 Hz, 1H, ArH), 7.02 – 7.00 (d, *J* = 8.0 Hz, 1H, ArH), 4.68 (s, 1H, CH), 3.68 (s, 6H, 2CH<sub>3</sub>), 2.39 (s, 3H, CH<sub>3</sub>). <sup>13</sup>C NMR (100 MHz, CDCl<sub>3</sub>): δ<sub>C</sub> 170.2 (C=O), 165.8 (C=O), 140.0 (C), 136.8 (C), 134.4 (C), 132.2 (CH), 131.7 (CH), 129.1 (CH), 127.8 (CH), 127.6 (CH), 126.9 (CH), 123.8 (C), 56.9 (CH), 53.6 (CH<sub>3</sub>), 21.6 (CH<sub>3</sub>). IR (neat, cm<sup>-1</sup>): 3325.6, 2948.8, 2926.7, 1741.4, 1713.2, 1663.3, 1534.5, 1479.3, 1156.3. HRMS (ESI): calcd. for C<sub>19</sub>H<sub>19</sub>NO<sub>5</sub>H<sup>+</sup>: 342.1341, found: 342.1330.

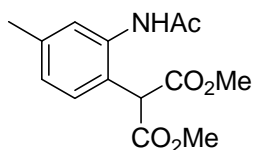

**Dimethyl 2-(2-acetamido-4-methylphenyl)malonate (2r).** Eluent: 50% *n*-hexane / 50% ethyl acetate. The product was obtained as brown solid (51% yield), mp 139 – 140 °C. <sup>1</sup>H NMR (400 MHz, CDCl<sub>3</sub>): δ<sub>H</sub> 8.7 (s, 1H, NH), 7.51 (s, 1H, ArH), 7.11 – 7.09 (d, *J* = 8.0 Hz, 1H, ArH), 6.98 – 6.96 (d, *J* = 8.0 Hz, 1H, ArH), 4.61 (s, 1H, CH), 3.74 (s, 6H, 2CH<sub>3</sub>), 2.34 (s, 3H, CH<sub>3</sub>), 2.12 (s, 3H, CH<sub>3</sub>). <sup>13</sup>C NMR (100 MHz, CDCl<sub>3</sub>): δ<sub>C</sub> 170.1 (C=O), 169.2 (C=O), 140.0 (C), 136.5 (C), 131.6 (CH), 127.8 (CH), 127.0 (CH), 123.7 (C), 56.6 (CH), 53.5 (CH<sub>3</sub>), 24.3 (CH<sub>3</sub>), 21.6 (CH<sub>3</sub>). IR (neat, cm<sup>-1</sup>): 3235.5, 2955.2, 1760.9, 1744.2, 1661.3, 1582.3, 1298.4, 1149.7. HRMS (ESI): calcd. for C<sub>14</sub>H<sub>17</sub>NO<sub>5</sub>H<sup>+</sup>: 280.1185, found: 280.1175.

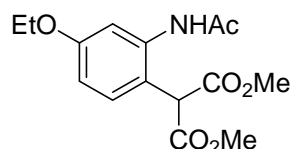

**Dimethyl 2-(2-acetamido-4-ethoxyphenyl)malonate (2s).** Eluent: 50% *n*-hexane / 50% ethyl acetate. The product was obtained as pale yellow solid (48% yield), mp 121 – 122 °C. <sup>1</sup>H NMR (400 MHz, CDCl<sub>3</sub>): δ<sub>H</sub> 8.9 (s, 1H, NH), 7.32 (s, 1H, ArH),

7.10 – 7.08 (d,  $J = 8.0$  Hz, 1H, ArH), 6.70 – 6.68 (d,  $J = 8.0$  Hz, 1H, ArH), 4.58 (s, 1H, CH), 4.05 – 4.00 (q,  $J = 6.8$  Hz, 2H, OCH<sub>2</sub>), 3.75 (s, 6H, 2CH<sub>3</sub>), 2.14 (s, 3H, CH<sub>3</sub>), 1.41 – 1.37 (t,  $J = 6.8$  Hz, 3H, CH<sub>3</sub>). <sup>13</sup>C NMR (100 MHz, CDCl<sub>3</sub>):  $\delta_C$  170.3 (C=O), 160.0 (C=O), 137.7 (C), 132.5 (CH), 117.9 (C), 112.8 (CH), 112.4 (CH), 64.0 (CH<sub>2</sub>), 56.4 (CH), 53.5 (CH<sub>3</sub>), 24.3 (CH<sub>3</sub>), 15.0 (CH<sub>3</sub>). IR (neat, cm<sup>-1</sup>): 3183.1, 3135.6, 3002.6, 1749.5, 1734.2, 1653.9, 1501.8, 1195.8, 1157.5. HRMS (ESI): calcd. for C<sub>15</sub>H<sub>19</sub>NO<sub>6</sub>H<sup>+</sup>: 310.1291, found: 310.1283.

### 3. Procedure for Cyclization Reaction of 2g and 2h

To a solution of **2g** or **2h** (0.2 mmol) in EtOH (5 mL), conc. HCl solution (0.1 mL) was added and the mixture was stirred at reflux for 0.5 h. Then the reaction was cooled to room temperature and concentrated. The residue was diluted with ethyl acetate (10 mL). The mixture was washed with saturated sodium bicarbonate solution, dried with Na<sub>2</sub>SO<sub>4</sub> and concentrated under reduced pressure. The residue was then purified by flash column chromatography to give the free indole **3**.

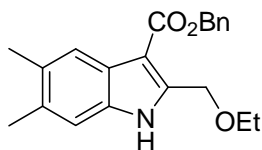

**Benzyl 2-(ethoxymethyl)-5,6-dimethyl-1H-indole-3-carboxylate (3g)**. Eluent: 70% *n*-hexane / 30% ethyl acetate. The product was obtained as pale yellow solid (73% yield), mp 120 – 123 °C. <sup>1</sup>H NMR (400 MHz, CDCl<sub>3</sub>):  $\delta_H$  8.98 (br, s, 1H, NH), 7.91 (s, 1H, ArH), 7.52 – 7.50 (d,  $J = 8.0$  Hz, 2H, ArH), 7.43 – 7.33 (m, 3H, ArH), 7.16 (s, 1H, ArH), 5.42 (s, 2H, CH<sub>2</sub>), 5.05 (s, 2H, CH<sub>2</sub>), 3.71 – 3.66 (q,  $J = 6.8$  Hz, 2H, OCH<sub>2</sub>), 2.37 (s, 6H, 3CH<sub>3</sub>), 1.33 – 1.29 (t,  $J = 6.8$  Hz, 3H, CH<sub>3</sub>). <sup>13</sup>C NMR (100 MHz, CDCl<sub>3</sub>):  $\delta_C$  165.8 (C=O), 144.7 (C), 137.4 (C), 133.8 (C), 131.9 (C), 131.0 (C), 128.9 (CH), 128.3 (CH), 125.7 (C), 121.9 (CH), 111.9 (CH), 102.5 (C), 67.3 (CH<sub>2</sub>), 66.5 (CH<sub>2</sub>), 65.7 (CH<sub>2</sub>), 20.7 (CH<sub>3</sub>), 20.6 (CH<sub>3</sub>), 15.6 (CH<sub>3</sub>). IR (KBr, cm<sup>-1</sup>): 3102.1, 2891.6, 1782.3, 1646.1, 1598.2, 1390.2. HRMS (ESI): calcd. for C<sub>21</sub>H<sub>23</sub>NO<sub>3</sub>Na<sup>+</sup>: 360.1576, found: 360.1570.

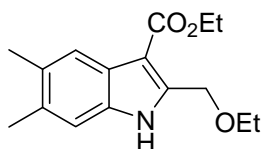

**Ethyl 2-(ethoxymethyl)-5,6-dimethyl-1H-indole-3-carboxylate (3h)**. Eluent: 70% *n*-hexane / 30% ethyl acetate. The product was obtained as white solid (69% yield), mp 113 – 115 °C. <sup>1</sup>H NMR (400 MHz, CDCl<sub>3</sub>):  $\delta_H$  8.90 (br, s, 1H, NH), 7.87 (s, 1H,

ArH), 7.15 (s, 1H, ArH), 5.05 (s, 2H, CH<sub>2</sub>), 4.42 – 4.36 (q, *J* = 6.8 Hz, 2H, OCH<sub>2</sub>), 3.72 – 3.67 (q, *J* = 6.8 Hz, 2H, OCH<sub>2</sub>), 2.38 (s, 3H, CH<sub>3</sub>), 2.36 (s, 3H, CH<sub>3</sub>), 1.46 – 1.43 (t, *J* = 6.8 Hz, 3H, CH<sub>3</sub>), 1.33 – 1.30 (t, *J* = 6.8 Hz, 3H, CH<sub>3</sub>). <sup>13</sup>C NMR (100 MHz, CDCl<sub>3</sub>): δ<sub>C</sub> 166.2 (C=O), 144.3 (C), 133.8 (C), 131.9 (C), 130.9 (C), 125.7 (C), 121.8 (CH), 111.8 (CH), 102.8 (C), 67.3 (CH<sub>2</sub>), 66.4 (CH<sub>2</sub>), 59.9 (CH<sub>2</sub>), 20.7 (CH<sub>3</sub>), 20.6 (CH<sub>3</sub>), 15.6 (CH<sub>3</sub>), 15.0 (CH<sub>3</sub>). IR (neat, cm<sup>-1</sup>): 3012.1, 2953.6, 1713.4, 1604.1, 1451.2, 1392.1. HRMS (ESI): calcd. for C<sub>16</sub>H<sub>21</sub>NO<sub>3</sub>Na<sup>+</sup>: 298.1419, found: 298.1414.

#### 4. KIE Experiment

Intermolecular competitive experiment was designed to determine the primary KIE (*k*<sub>H</sub>/*k*<sub>D</sub>) value of the Pd-catalyzed arene C-H functionalizations.

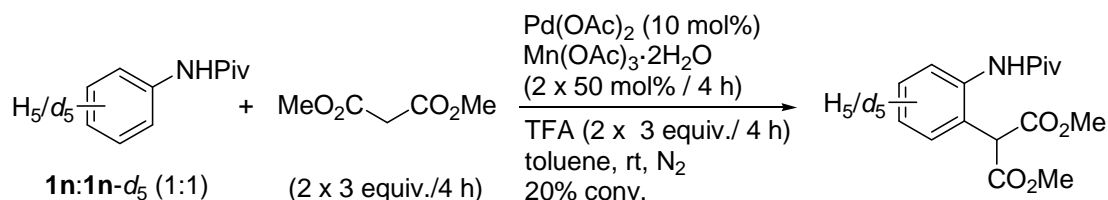

To a mixture of **1n** (0.1 mmol), **1n-d<sub>5</sub>** (0.1 mmol), Pd(OAc)<sub>2</sub> (4.5 mg, 10 mol%) and Mn(OAc)<sub>3</sub>·2H<sub>2</sub>O (0.0268 g, 50 mol%), dry toluene (1.5 mL), dimethyl malonate (0.6 mmol) and TFA (46.1 μL, 0.6 mmol) was added under a N<sub>2</sub> atmosphere. The mixture was stirred at room temperature. After 4 h, a batch of reagents [Mn(OAc)<sub>3</sub>·2H<sub>2</sub>O (50 mol%), dimethyl malonate (0.6 mmol), TFA (0.6 mmol)] was added to the mixture and the reaction was stirred for further 4 h. Then the reaction mixture was filtered over a plug of Celite® and then concentrated. The substrate conversion of **1n** and **1n-d<sub>5</sub>** was determined by <sup>1</sup>H NMR analysis using CH<sub>2</sub>Br<sub>2</sub> as the internal standard. The KIE values were calculated by the ratio of substrate conversions of **1n** and **1n-d<sub>5</sub>**. The KIE experiment was repeated three times and the average value (*k*<sub>H</sub>/*k*<sub>D</sub> = 3.3) was obtained.

Calculation of KIE value:

$$KIE = \frac{k_H}{k_D} = \frac{\% \text{ conv. of } 1n}{\% \text{ conv. of } (1n - d_5)}$$

| run     | KIE value |
|---------|-----------|
| 1       | 3.43      |
| 2       | 3.21      |
| 3       | 3.28      |
| Average | 3.31      |

## 5. Synthesis of Cyclopalladated Complex Pd-1r

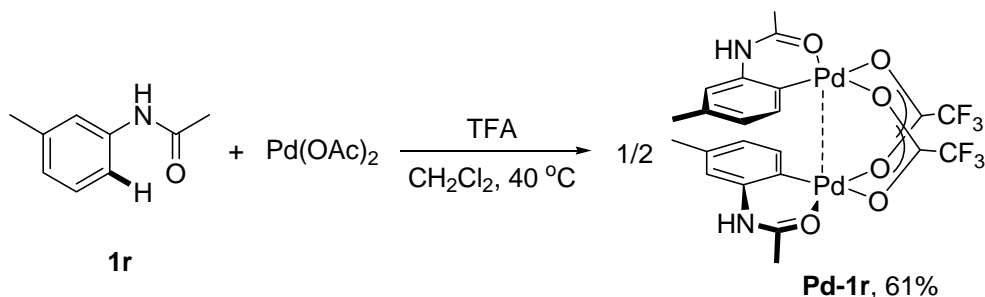

The cyclopalladated complex was prepared according to the literature.<sup>2</sup> A 25 mL Schlenk test-tube (with a Quick-fit stopper and side arm) was charged with [Pd(OAc)<sub>2</sub>] (0.0224g, 0.1 mmol), *N*-(*m*-tolyl)acetamide (**1r**, 0.0149 g, 0.1 mmol), TFA (0.0137g, 0.12 mmol). The Schlenk tube was evacuated and refilled with nitrogen for three times. Then the glass stopper was replaced by rubber septa. Dry DCM (5 mL), and TFA (0.0137g, 0.12 mmol) was added under a flow of nitrogen. The mixture was stirred at 40 °C for 3 h. The solution was then concentrated under reduced pressure and the residue was suspended in *n*-hexanes (5 mL). The suspension was filtered through Celite® and washed with *n*-hexanes (3 × 2 mL). The residue was then washed with DCM (5 mL), and the filtrate solution was collected and concentrated under reduced pressure to afford the cyclopalladated complex **Pd-1r** as a yellow solid (61% yield).

## 6. Stoichiometric Reaction of Pd-1r and Dimethyl Malonate

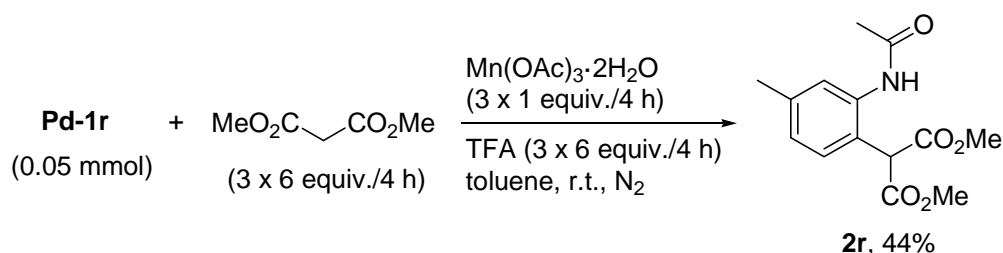

A 10 mL Schlenk test-tube was charged with **Pd-1r** (0.05 mmol) and Mn(OAc)<sub>3</sub>·2H<sub>2</sub>O (0.0268 g, 50 mol%). The Schlenk tube was evacuated and refilled with nitrogen for three times. Then the glass stopper was replaced by rubber septa. Dry toluene (1.5 mL), dimethyl malonate (0.6 mmol) and TFA (46.1 μL, 0.6 mmol) was added under a flow of nitrogen. The reaction mixture was stirred at room temperature. After 4 h, a batch of reagents [Mn(OAc)<sub>3</sub>·2H<sub>2</sub>O (50 mol%), 1,3-dicarbonyl compound (0.6 mmol), TFA (0.6 mmol)] was added to the mixture. The batchwise addition was performed again after further 4 h. The reaction was

subsequently allowed to stir for overnight. Then the reaction mixture was filtered over a plug of Celite® and then concentrated. The residue was purified by flash chromatography to give the desired product **2r** in 44% yield.

## 7. References

1. C.-W. Chan, Z. Zhou and W.-Y. Yu, *Adv. Synth. Catal.*, 2011, **353**, 2999.
2. C. S. Yeung, X. Zhao, N. Borduas and V. M. Dong, *Chem. Sci.*, 2010, **1**, 331.

## 8. $^1\text{H}$ and $^{13}\text{C}$ NMR Spectra

Figure S1.  $^1\text{H}$  NMR spectrum of 2a

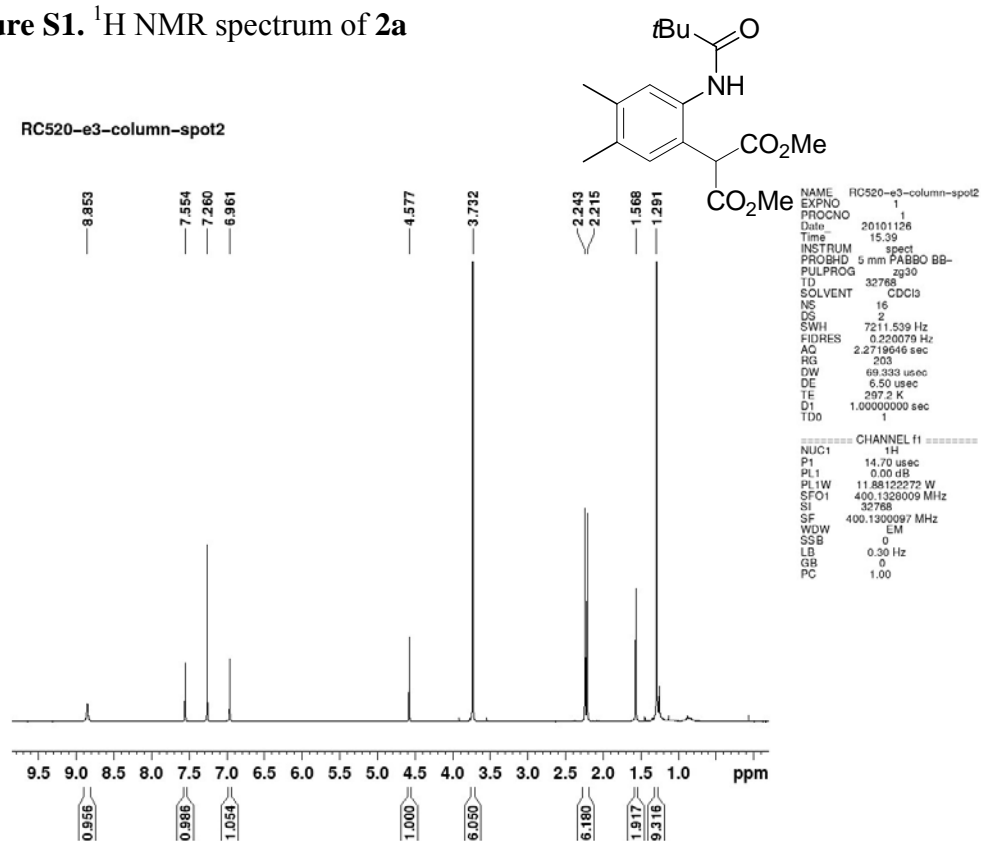

Figure S2.  $^{13}\text{C}$  NMR spectrum of 2a

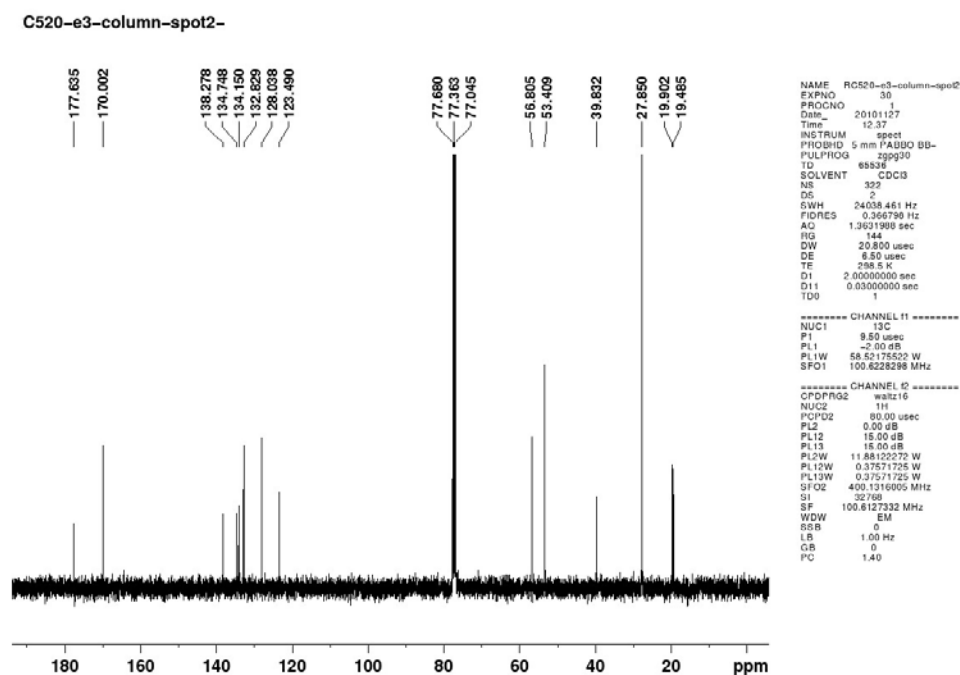

Figure S3. <sup>1</sup>H NMR spectrum of **8b**

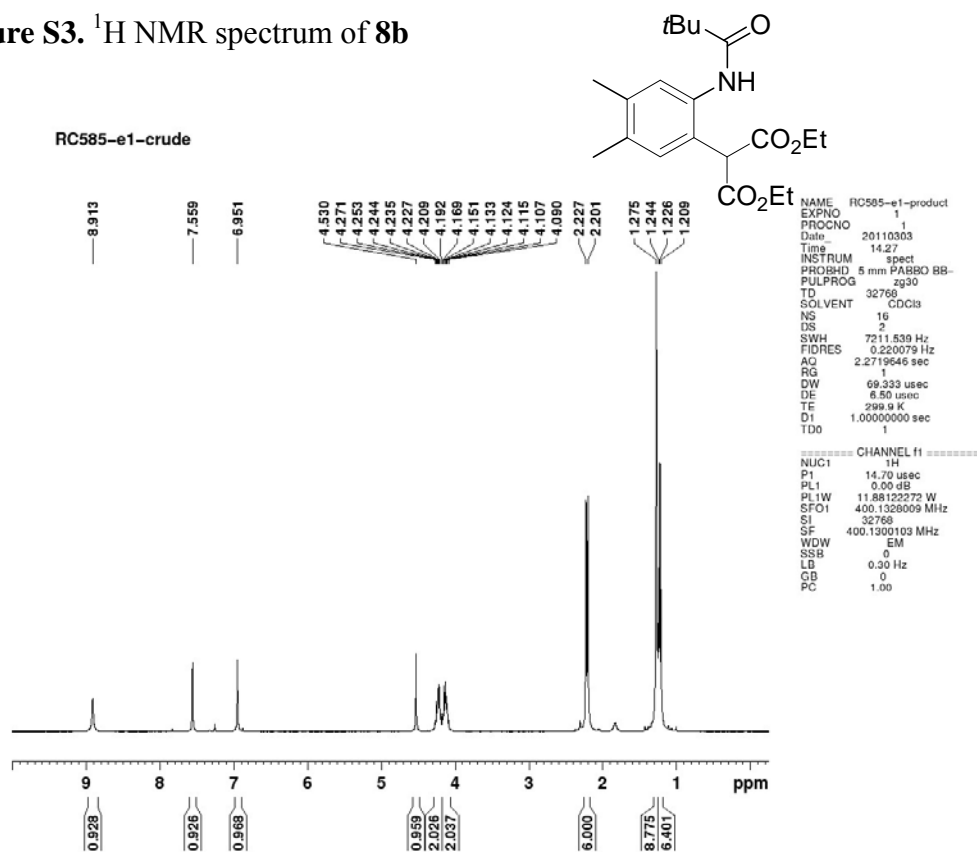

Figure S4. <sup>13</sup>C NMR spectrum of **2b**

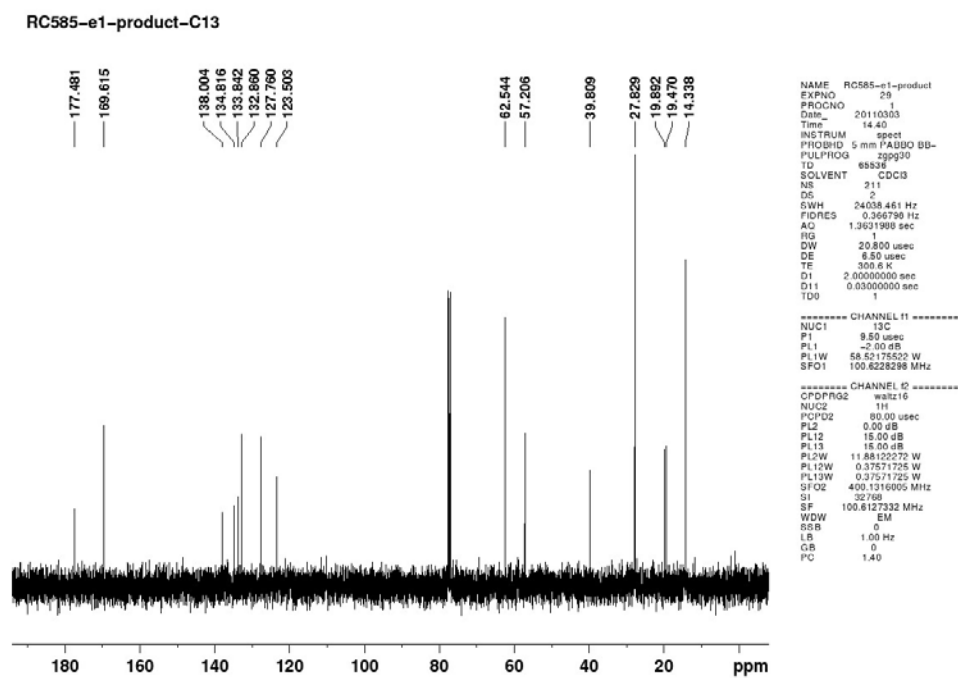



Figure S5. <sup>1</sup>H NMR spectrum of 2c

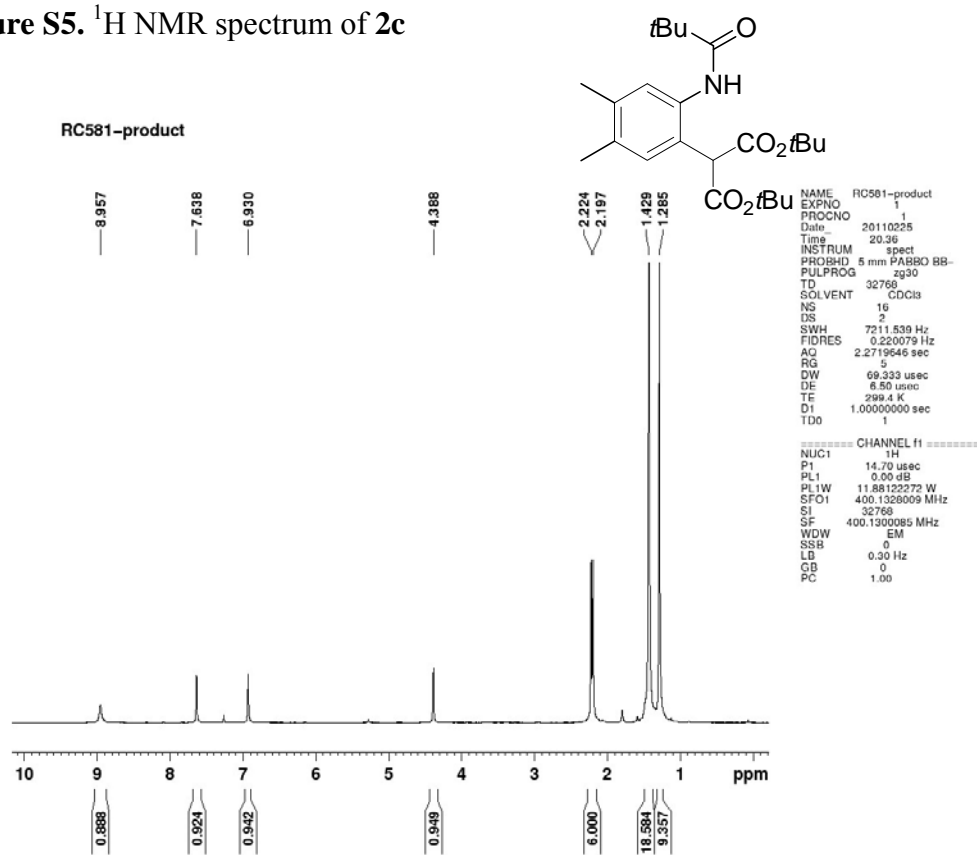

Figure S6. <sup>13</sup>C NMR spectrum of 2c

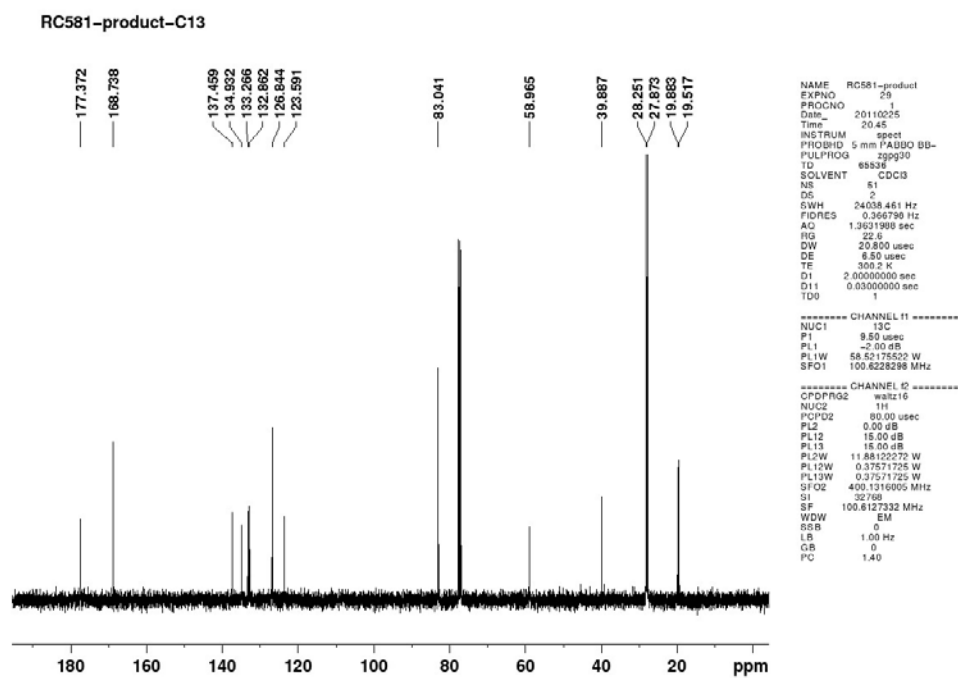

Figure S7. <sup>1</sup>H NMR spectrum of 2d

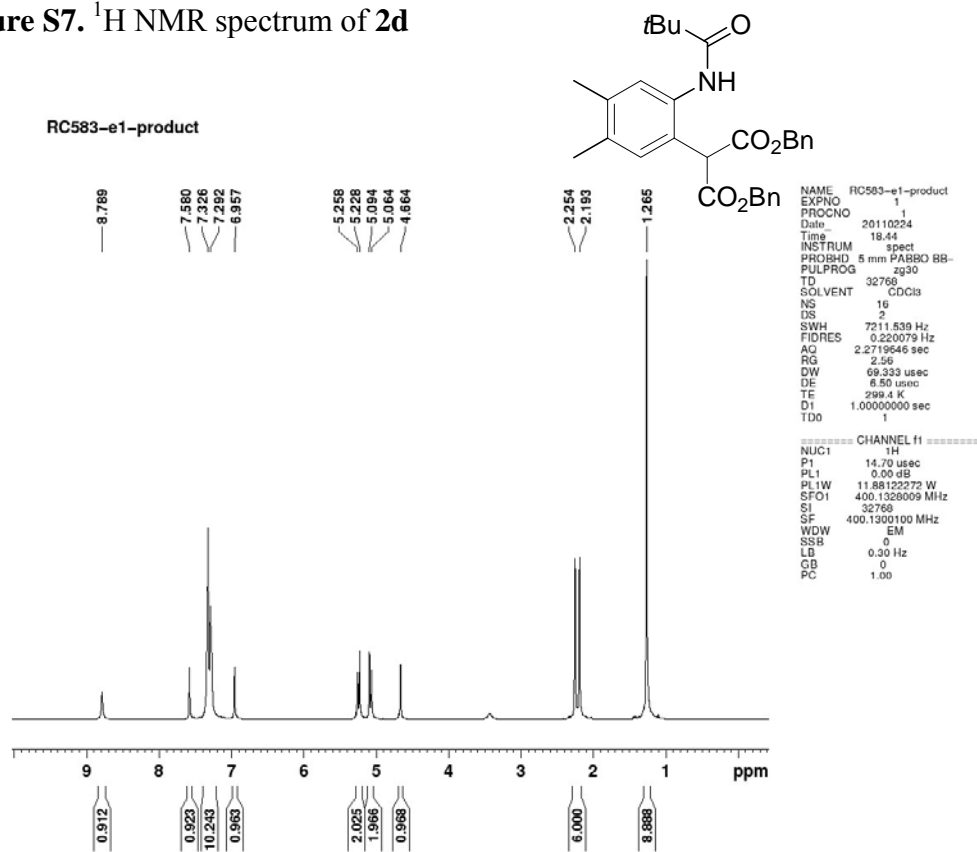

Figure S8. <sup>13</sup>C NMR spectrum of 2d

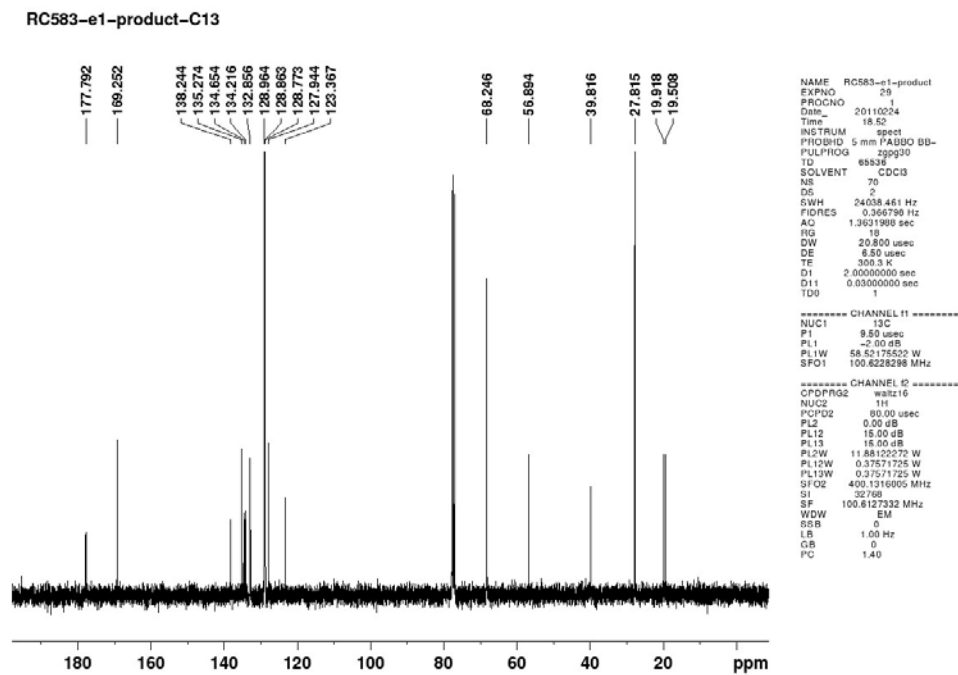

**Figure S9.** <sup>1</sup>H NMR spectrum of **2e**

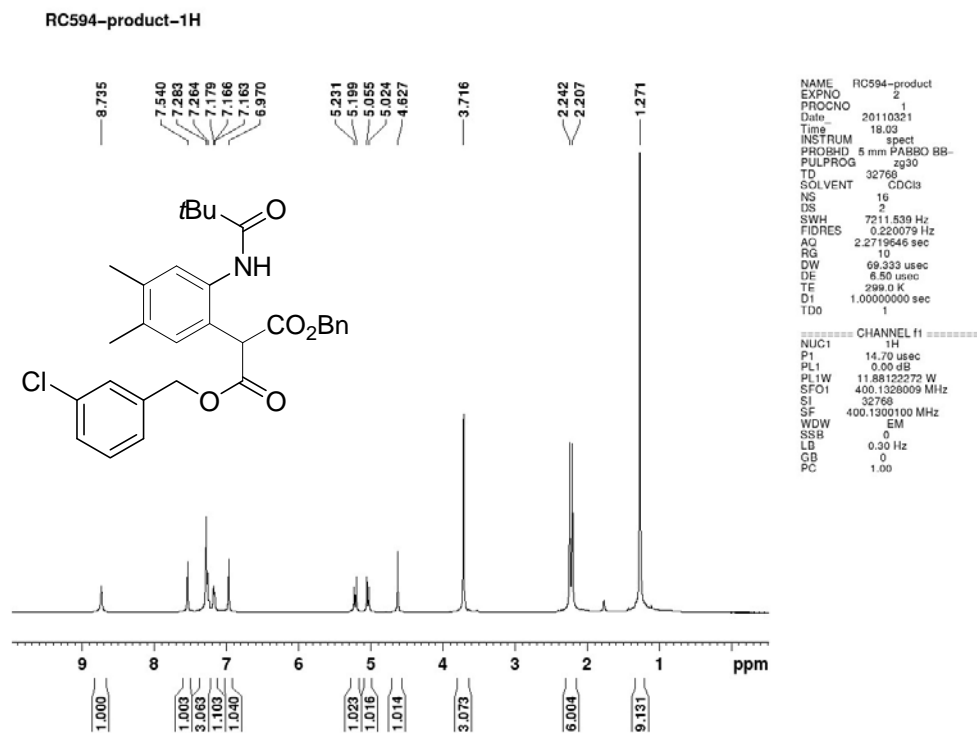

**Figure S10.** <sup>13</sup>C NMR spectrum of **2e**

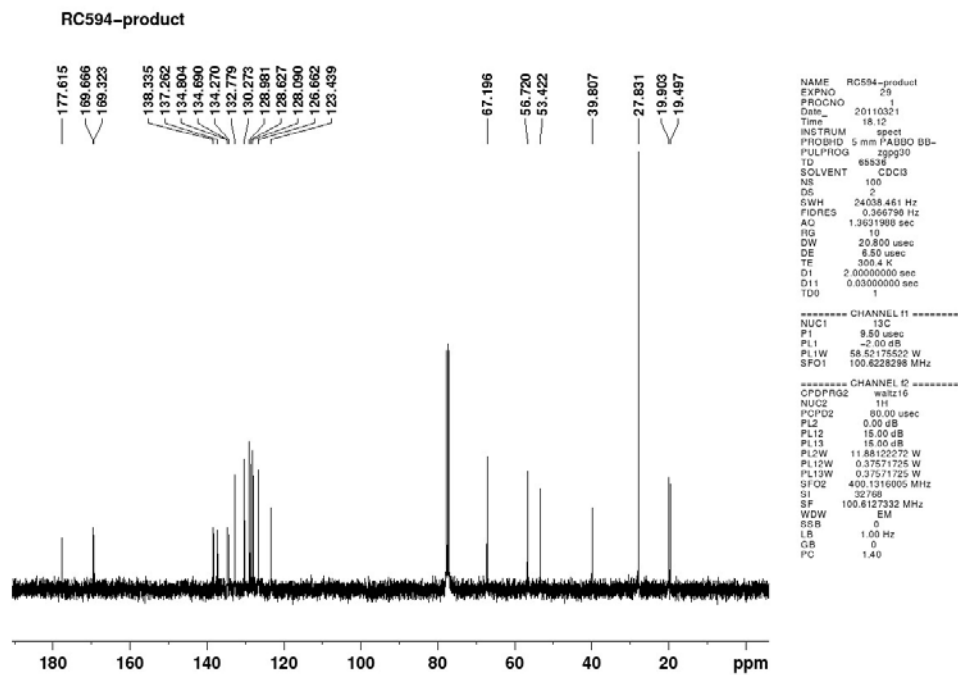

Figure S11. <sup>1</sup>H NMR spectrum of **2f**

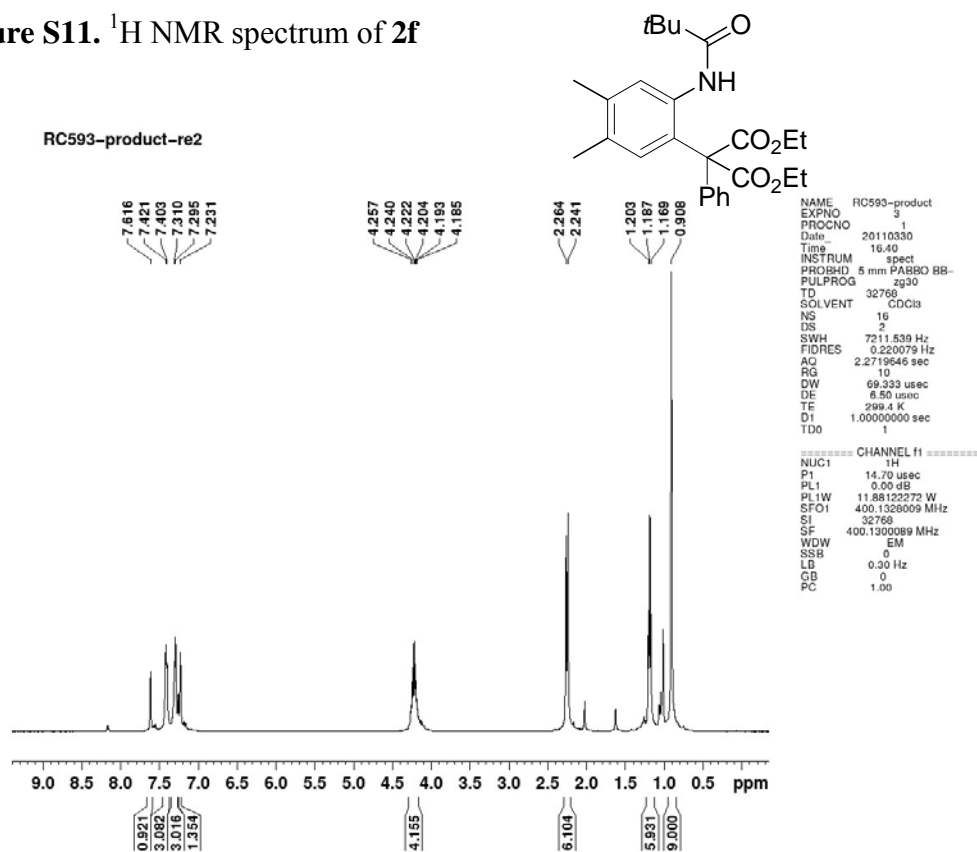

Figure S12. <sup>13</sup>C NMR spectrum of **2f**

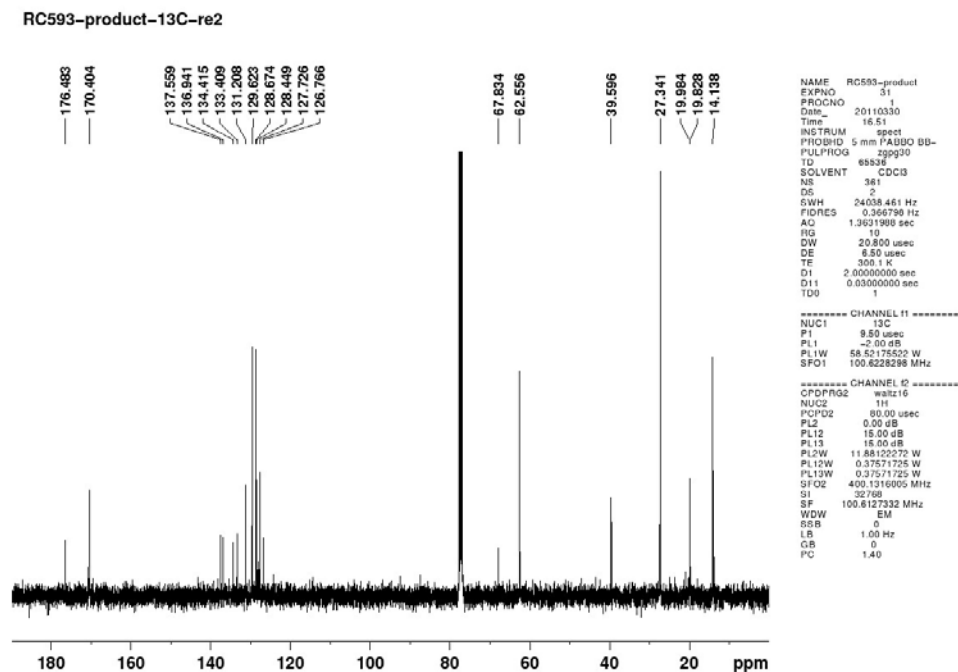

Figure S13. <sup>1</sup>H NMR spectrum of **2g**

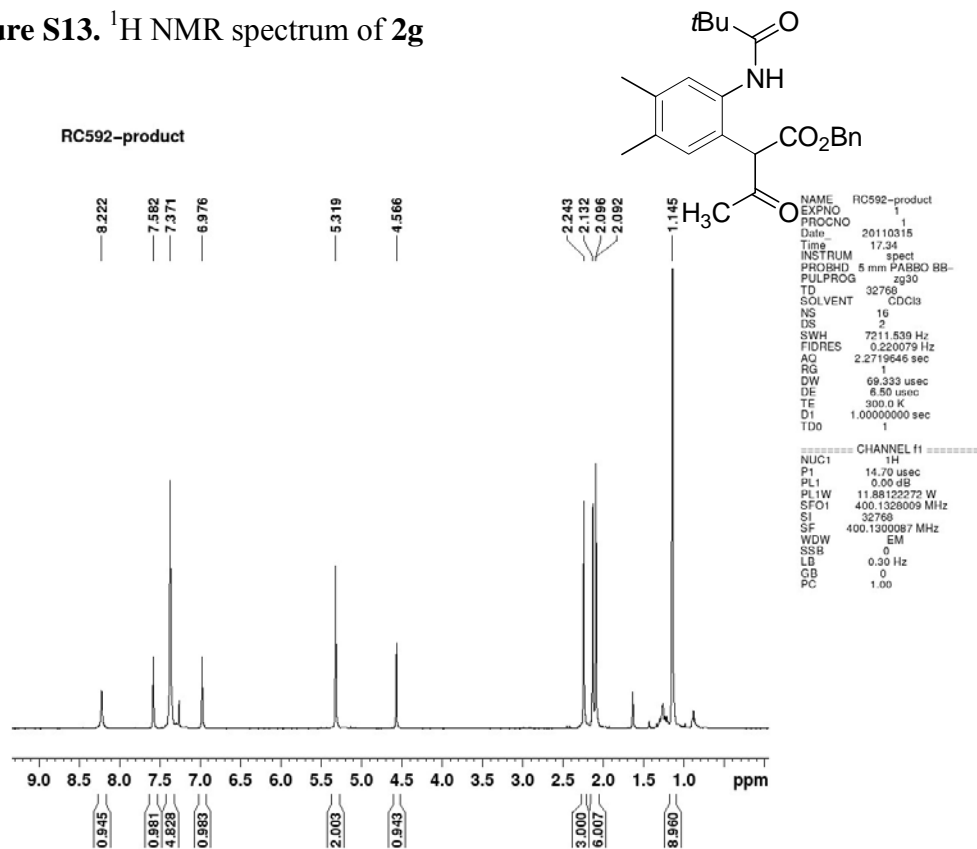

Figure S14. <sup>13</sup>C NMR spectrum of **2g**

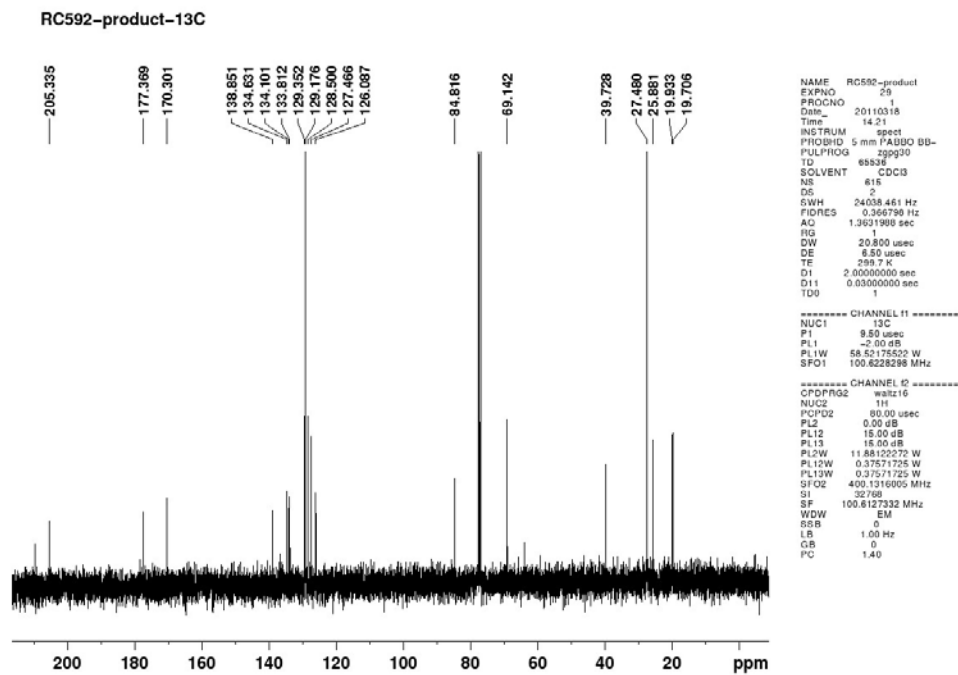

Figure S15. <sup>1</sup>H NMR spectrum of 2h

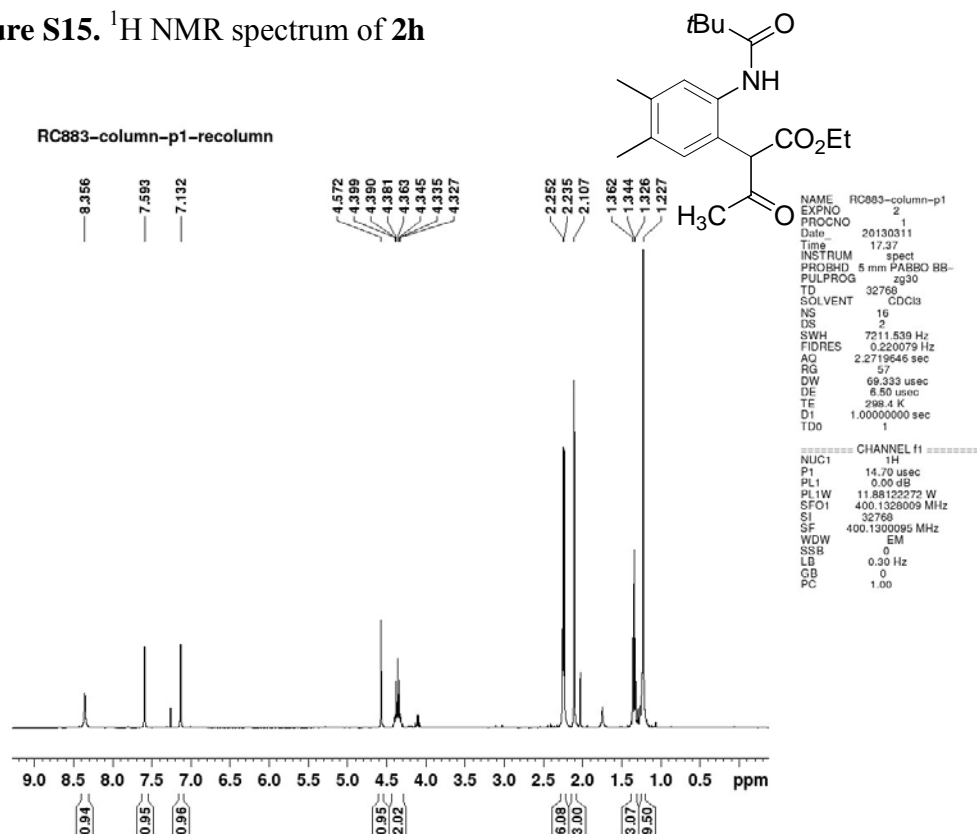

Figure S16. <sup>13</sup>C NMR spectrum of 2h

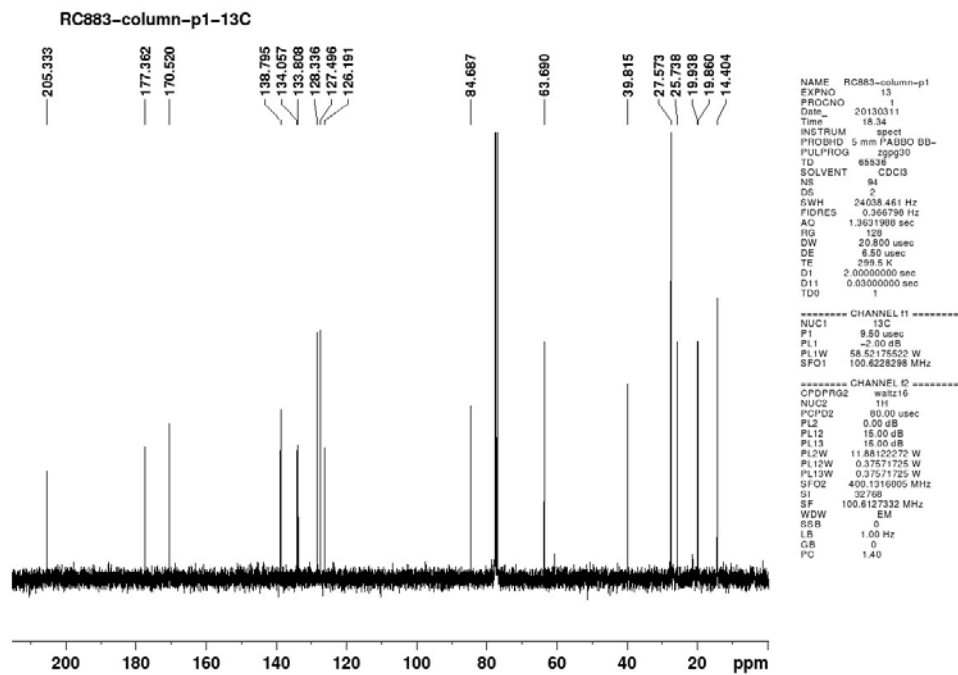

Figure S17. <sup>1</sup>H NMR spectrum of **2i**

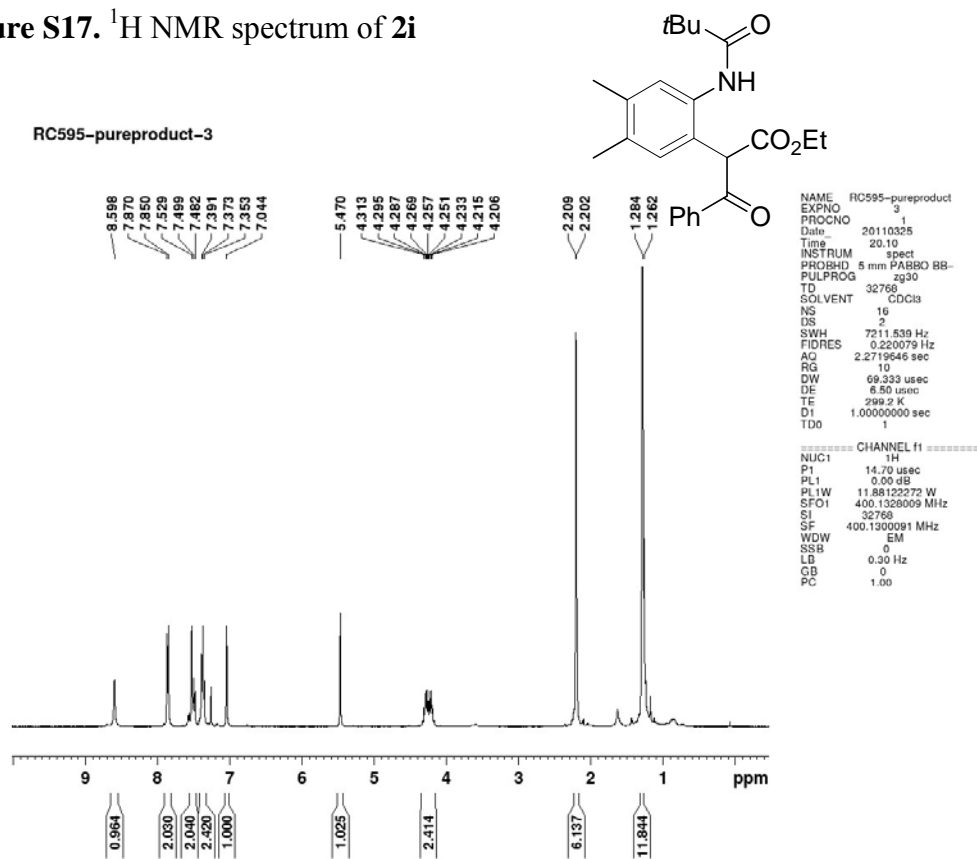

Figure S18. <sup>13</sup>C NMR spectrum of **2i**

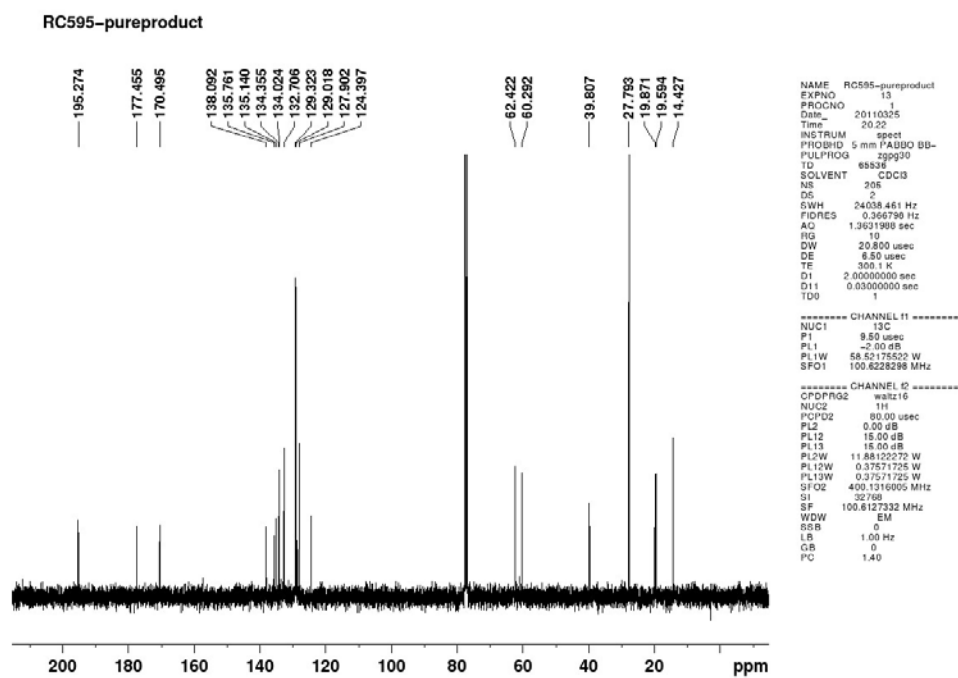

Figure S19. <sup>1</sup>H NMR spectrum of 2j

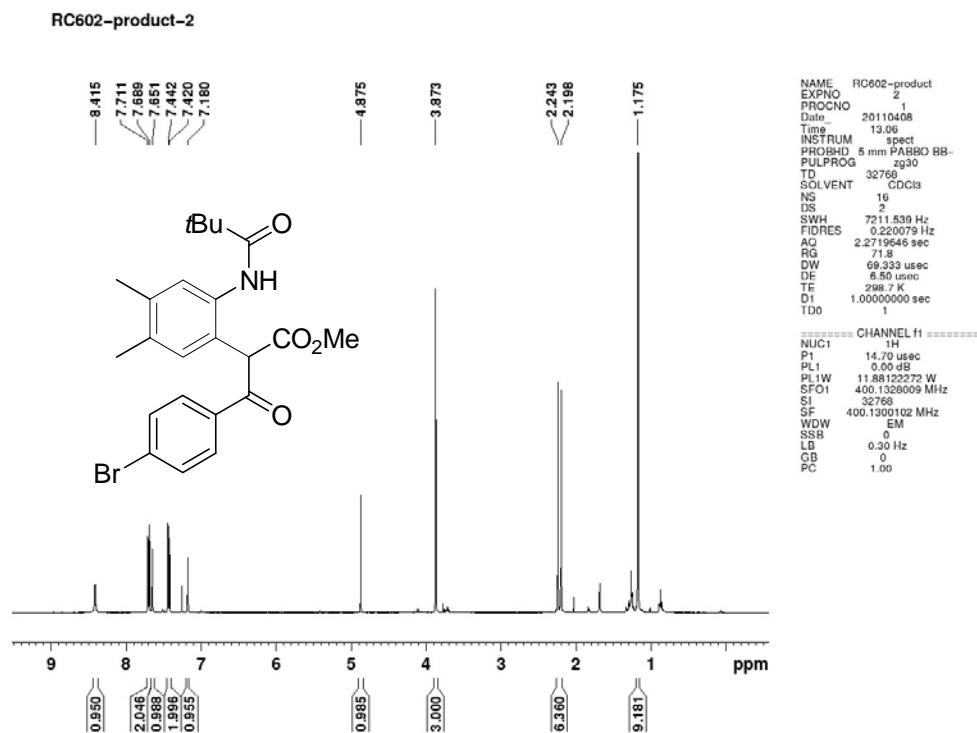

Figure S20. <sup>13</sup>C NMR spectrum of 2j

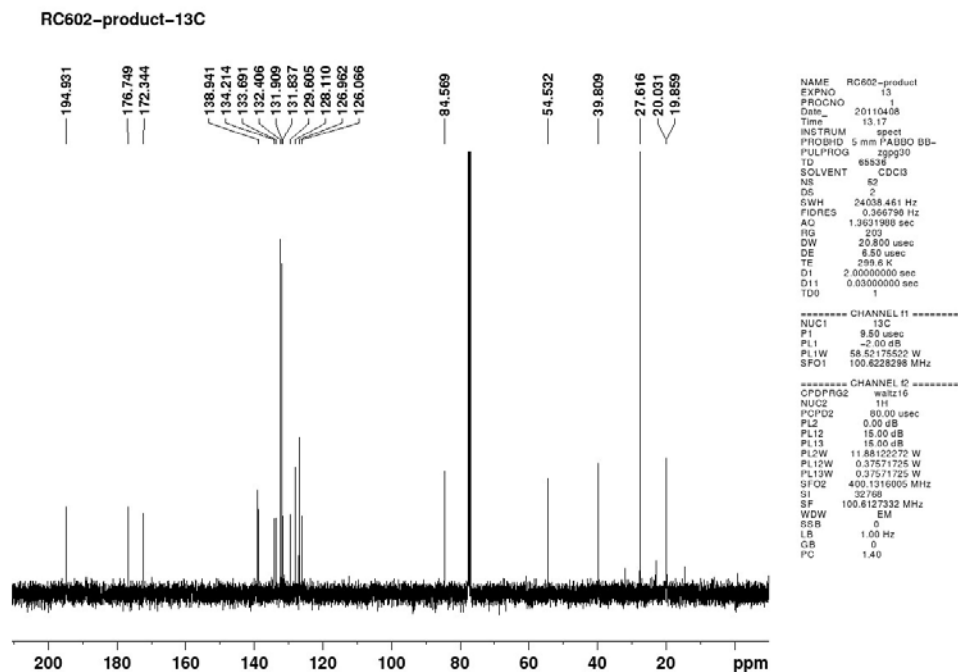



Figure S21. <sup>1</sup>H NMR spectrum of 2k

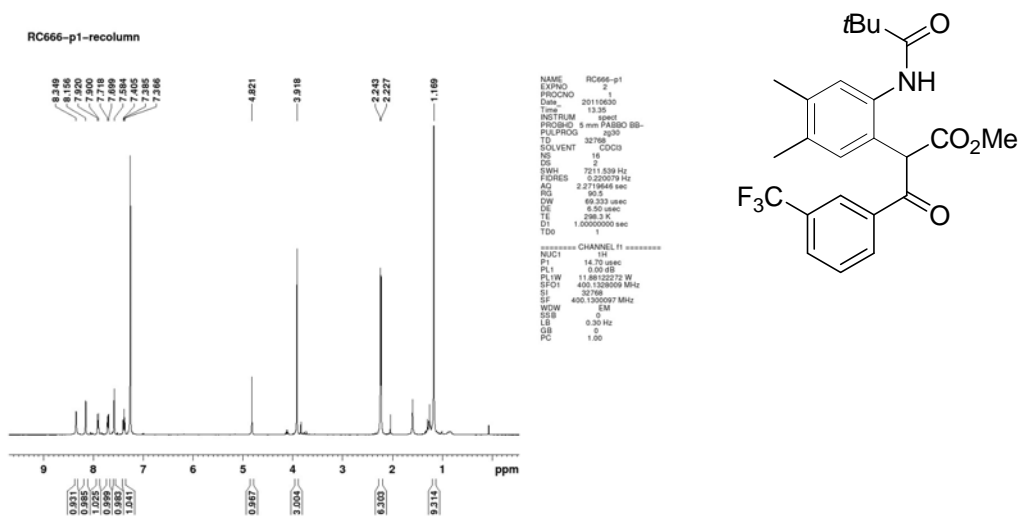

Figure S22. <sup>13</sup>C NMR spectrum of 2k

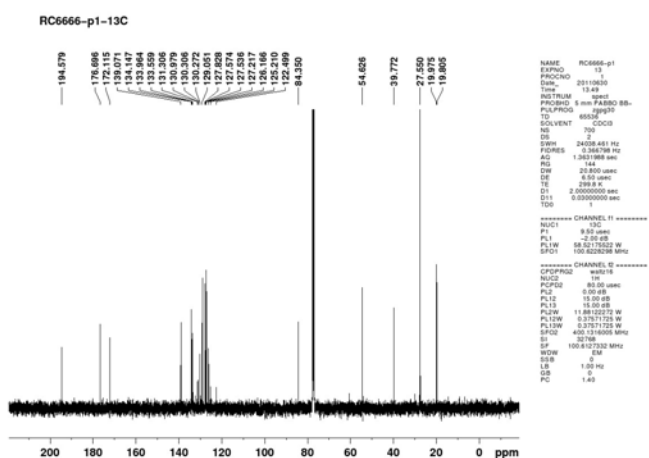

Figure S23. <sup>19</sup>F NMR spectrum of 2k

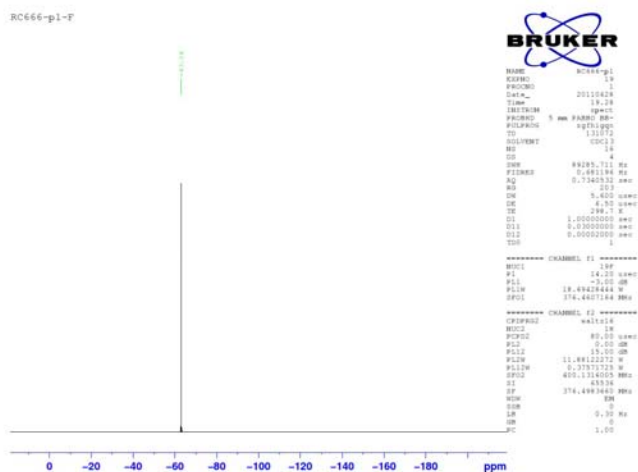

Figure S24. <sup>1</sup>H NMR spectrum of 2I

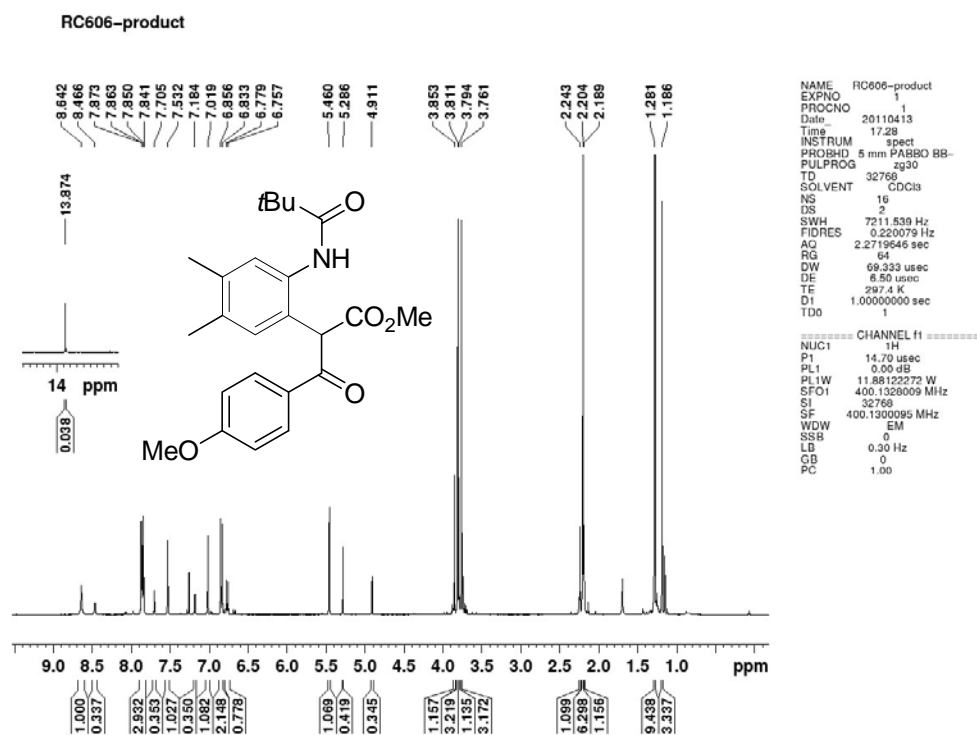

Figure S25. <sup>13</sup>C NMR spectrum of 2I

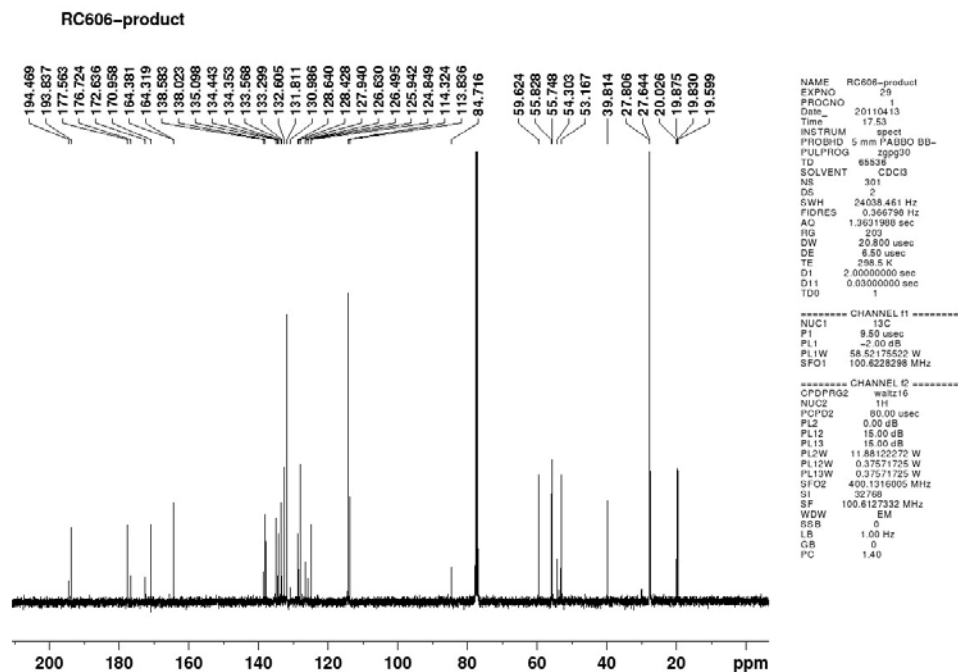

Figure S26. <sup>1</sup>H NMR spectrum of **2m**

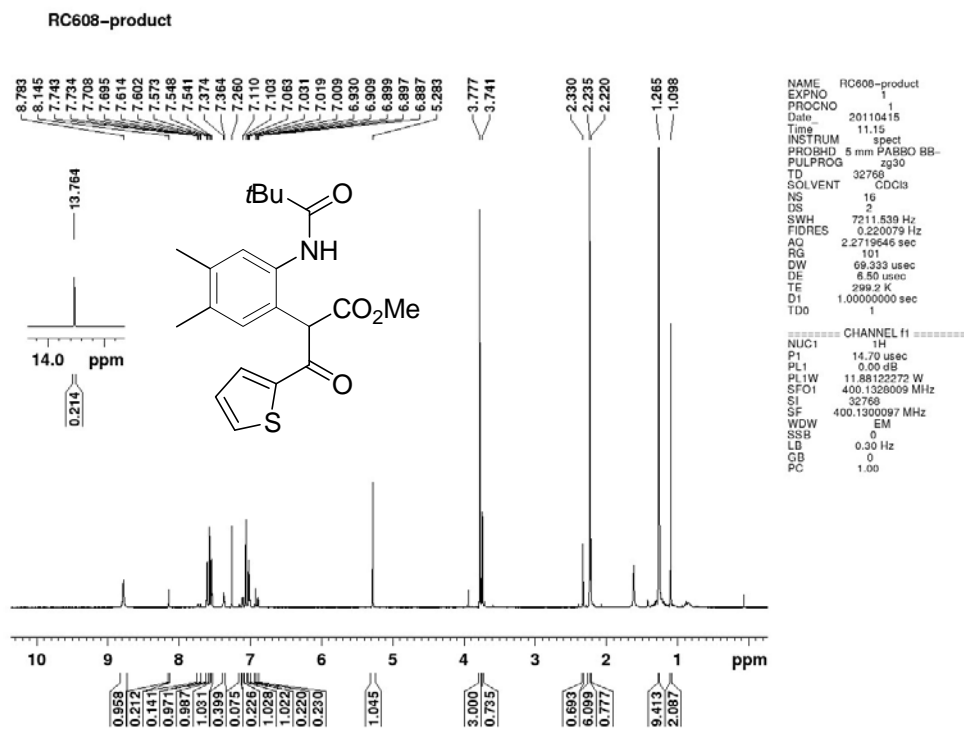

Figure S27. <sup>13</sup>C NMR spectrum of **2m**

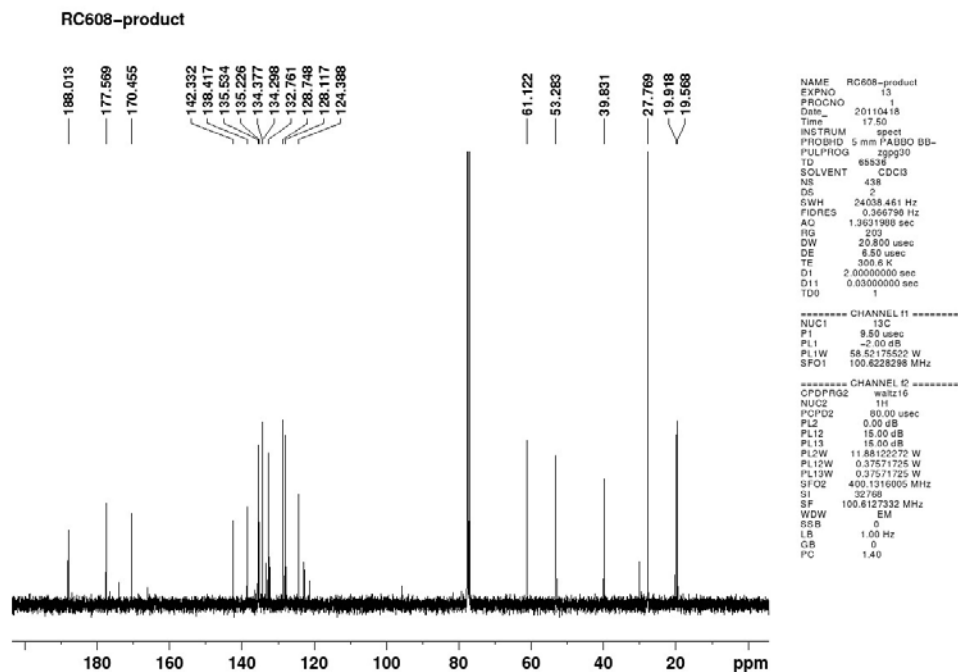

Figure S28. <sup>1</sup>H NMR spectrum of **2n**

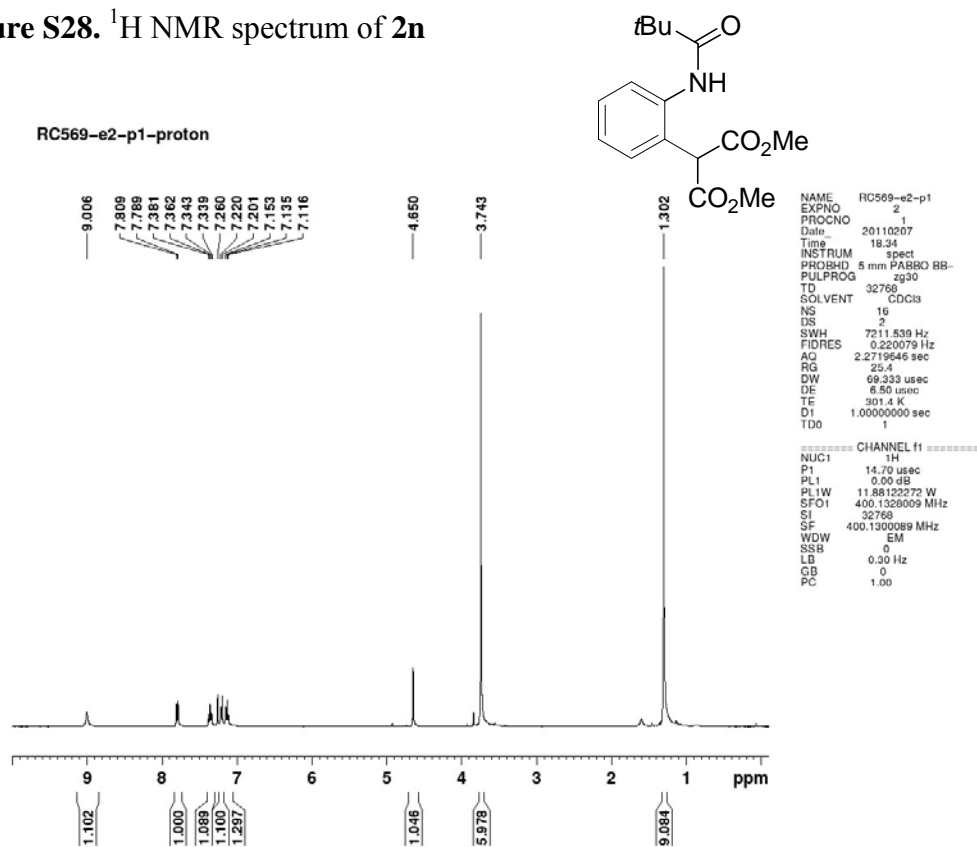

Figure S29. <sup>13</sup>C NMR spectrum of **2n**

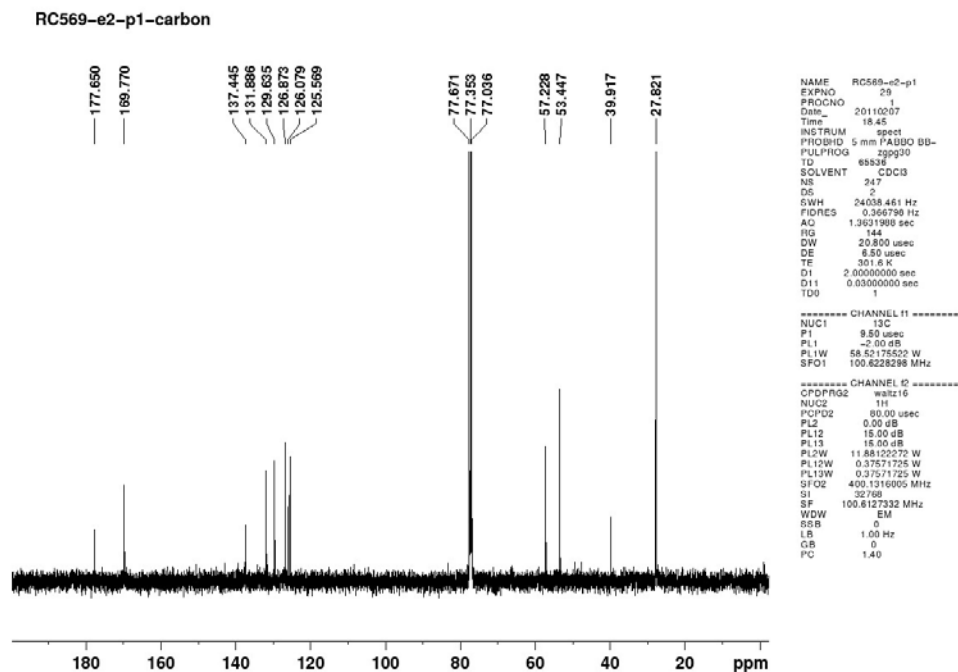

Figure S30. <sup>1</sup>H NMR spectrum of **2o**

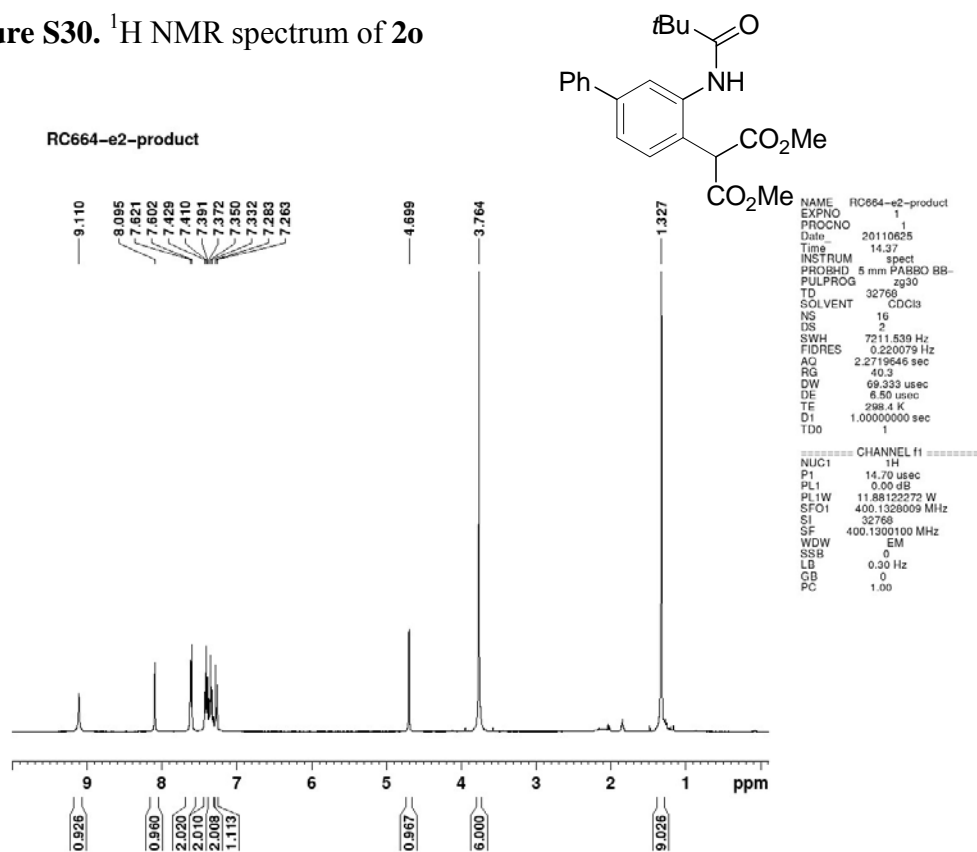

Figure S31. <sup>13</sup>C NMR spectrum of **2o**

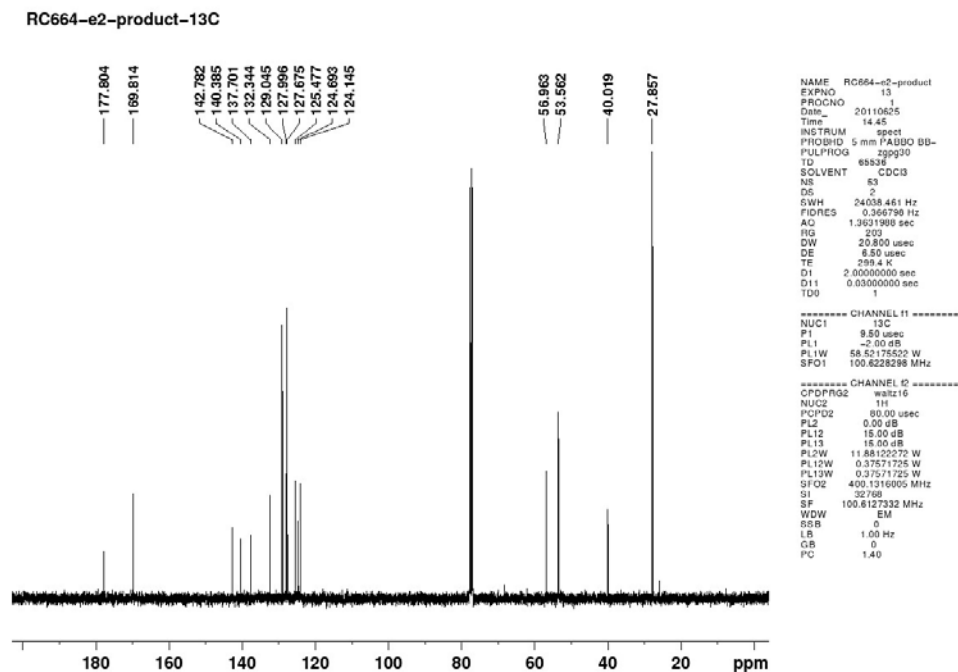

Figure S32. <sup>1</sup>H NMR spectrum of **2p**

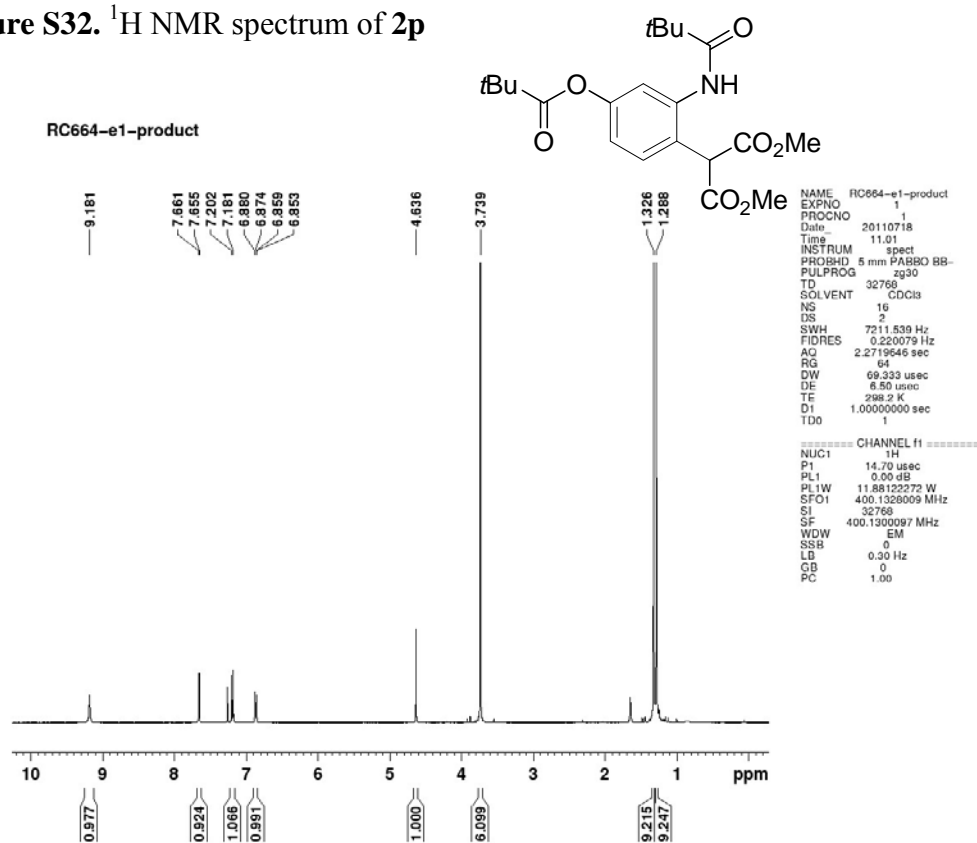

Figure S33. <sup>13</sup>C NMR spectrum of **2p**

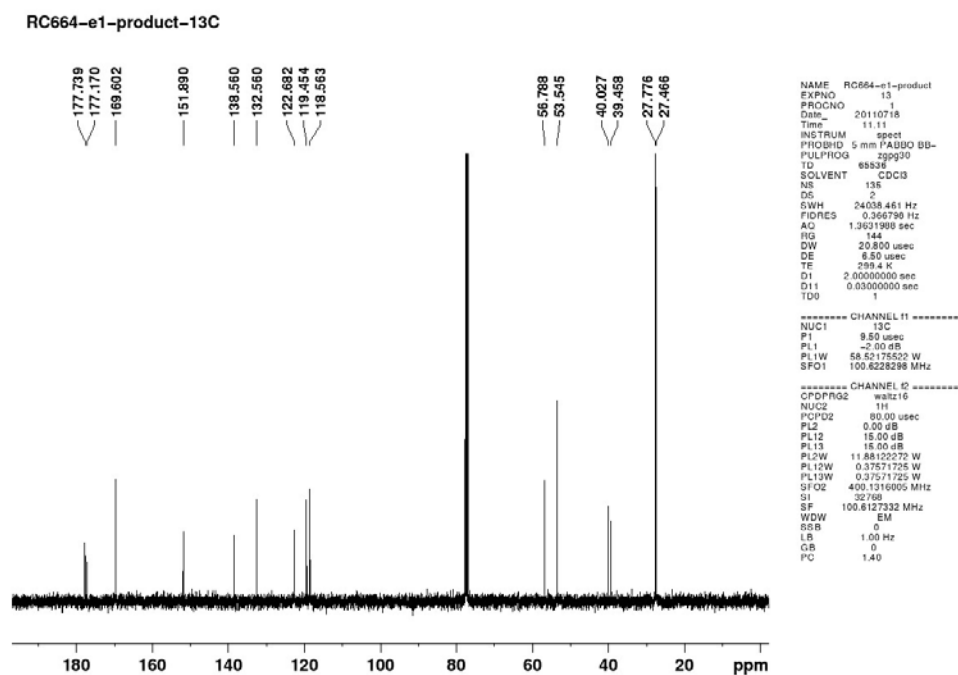

Figure S34. <sup>1</sup>H NMR spectrum of **2q**

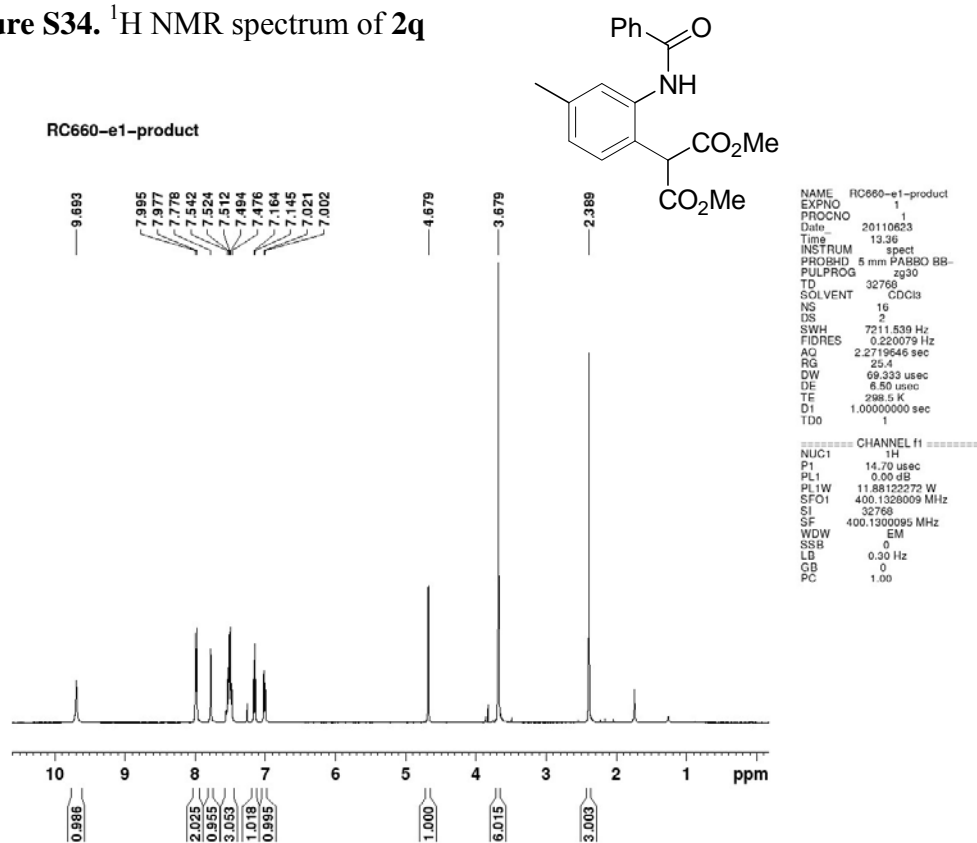

Figure S35. <sup>13</sup>C NMR spectrum of **2q**

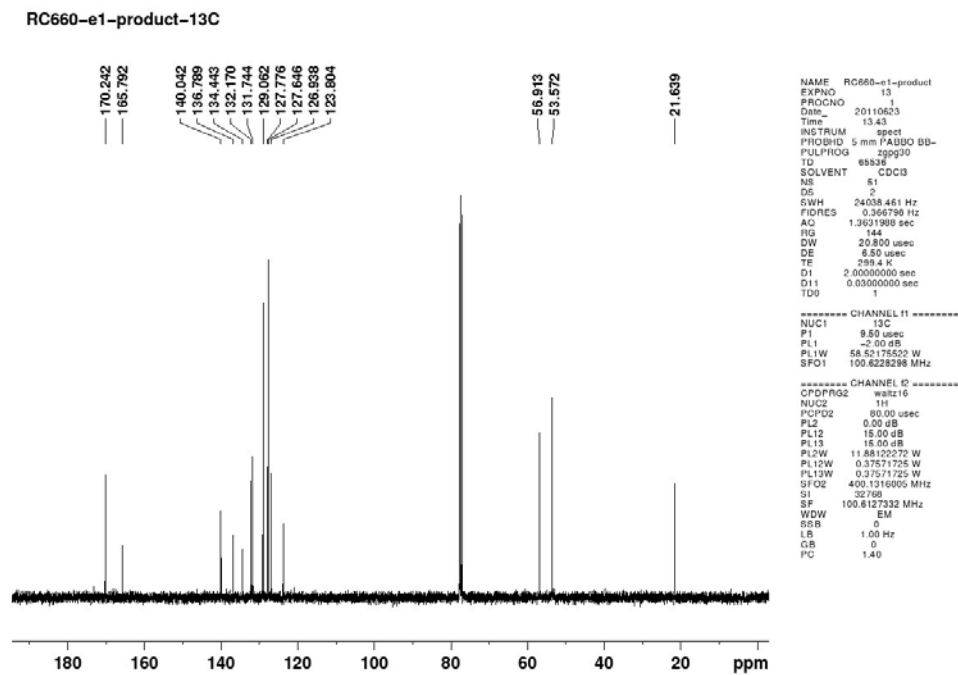

Figure S36. <sup>1</sup>H NMR spectrum of 2r

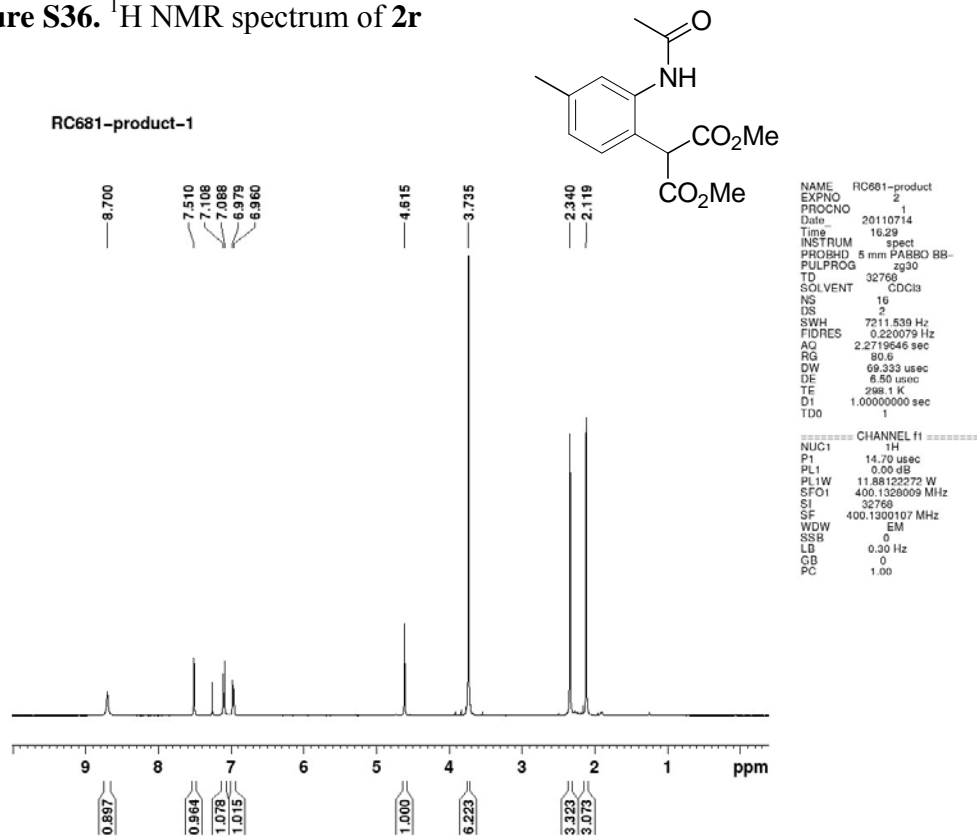

Figure S37. <sup>13</sup>C NMR spectrum of 2r

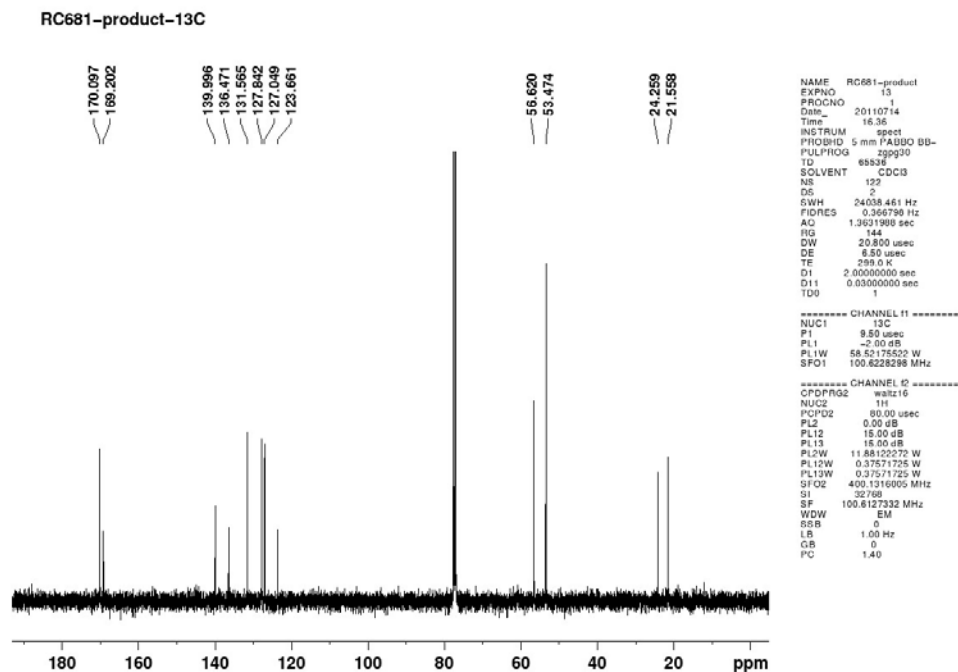



Figure S38. <sup>1</sup>H NMR spectrum of 2s

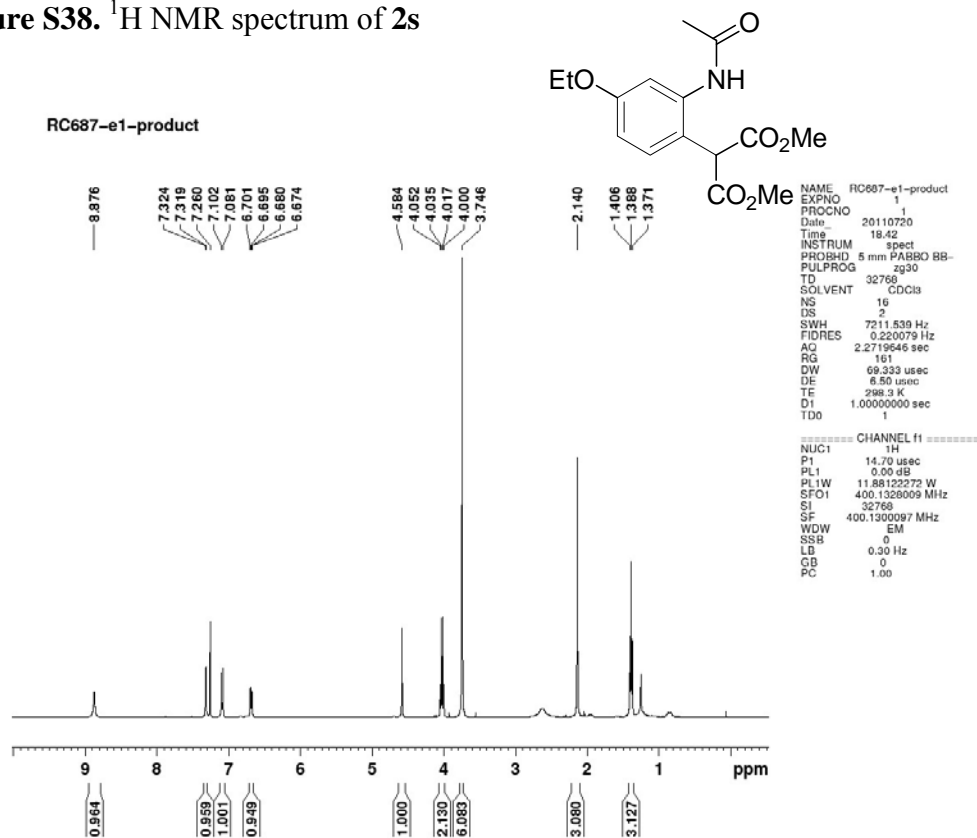

Figure S39. <sup>13</sup>C NMR spectrum of 2s

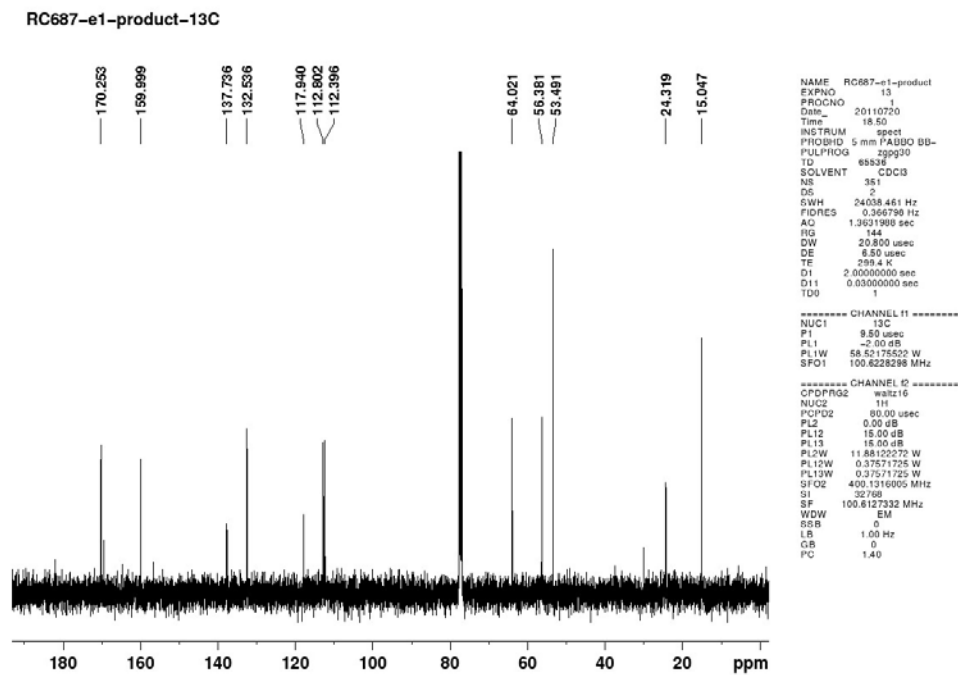

Figure S40. <sup>1</sup>H NMR spectrum of **3g**

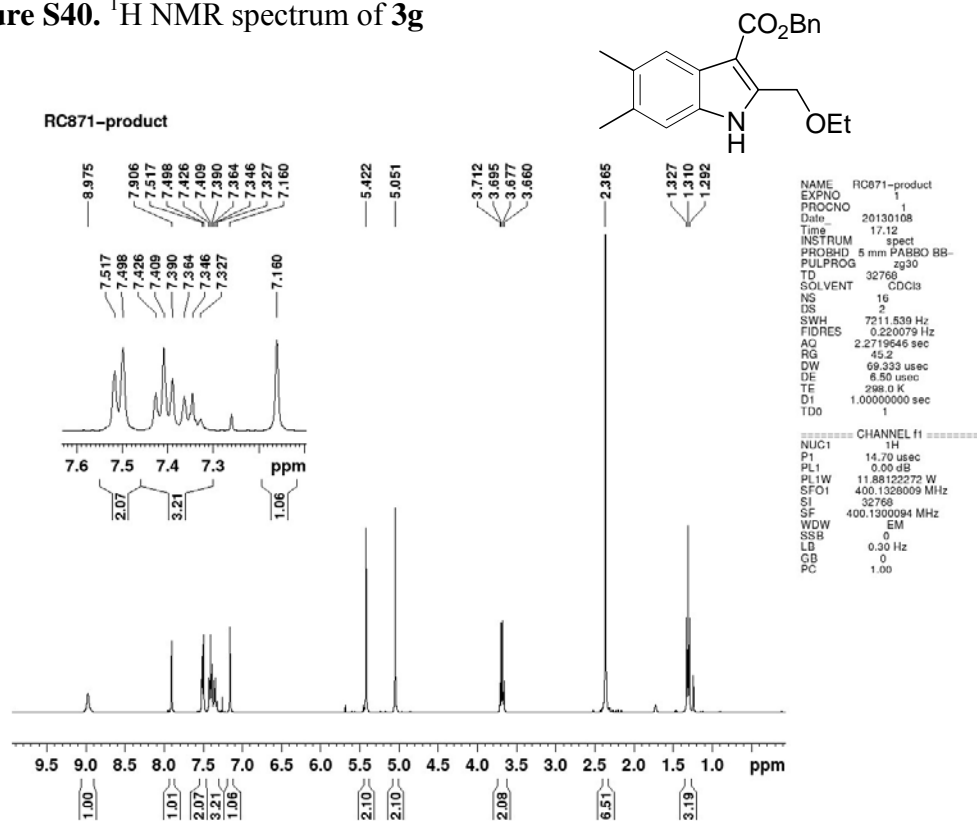

Figure S41. <sup>13</sup>C NMR spectrum of **3g**

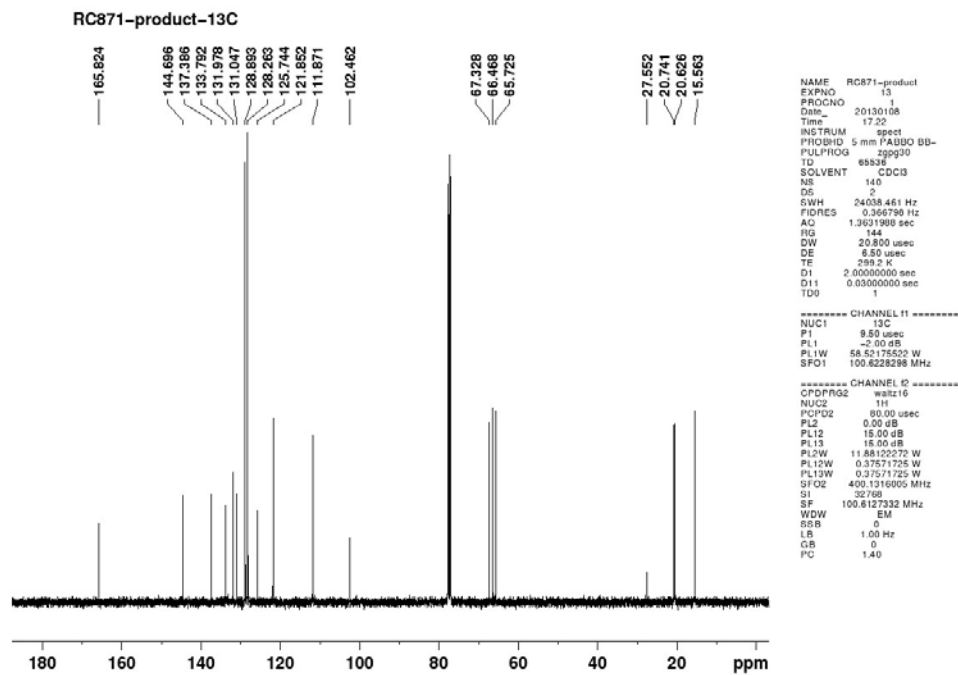

Figure S42. <sup>1</sup>H NMR spectrum of 3h

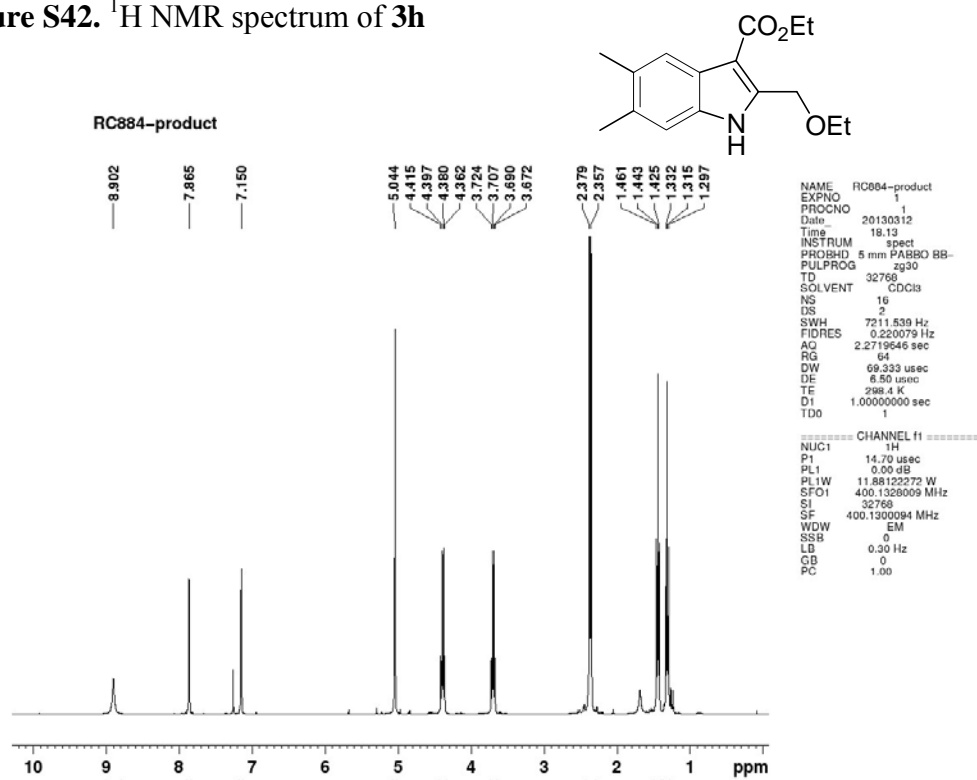

Figure S43. <sup>13</sup>C NMR spectrum of 3h

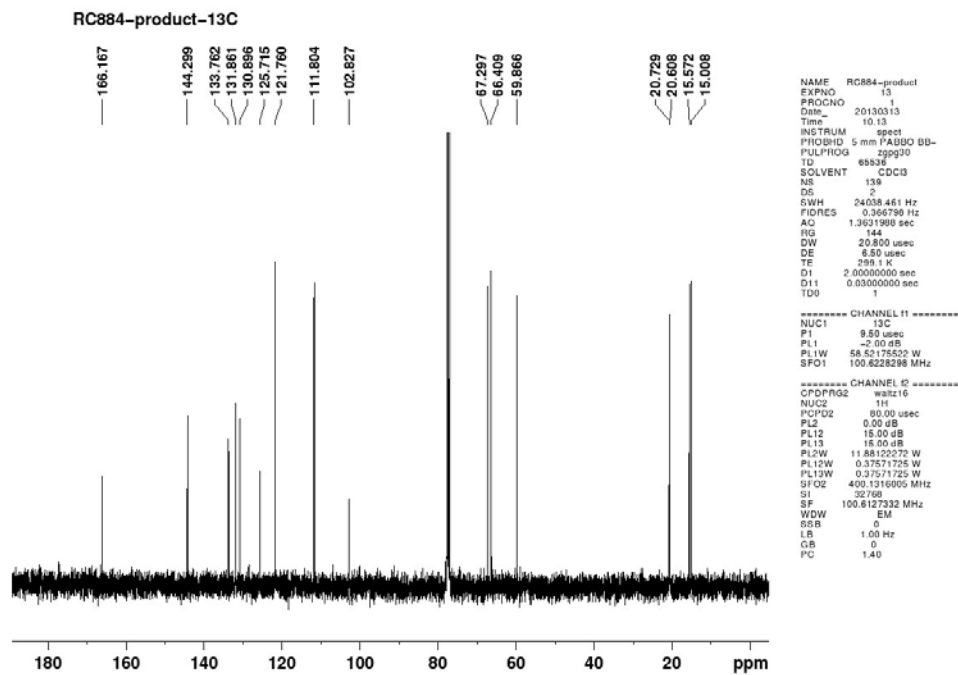

## 9. X-ray Crystallographic Data of 2c

Figure S44. Molecular Structure of 2c

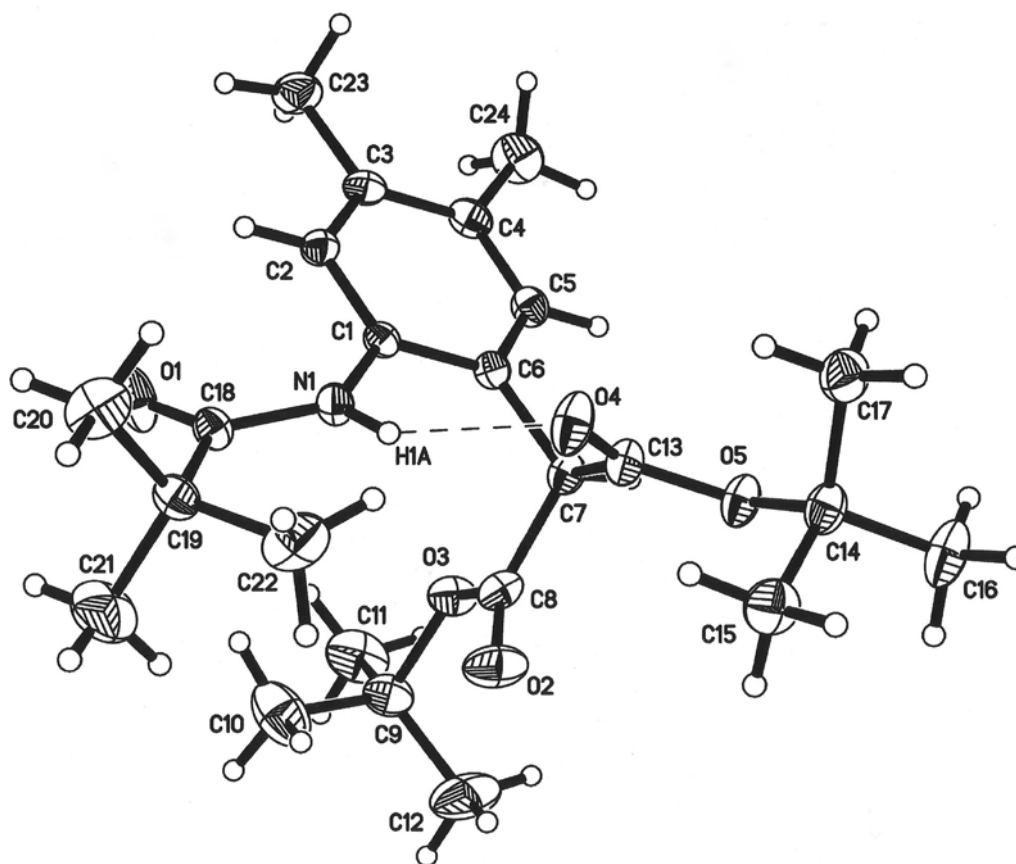

Table S1. Crystal data and structure refinement for 2c.

|                        |                                                  |                |
|------------------------|--------------------------------------------------|----------------|
| Identification code    | cww6                                             |                |
| Empirical formula      | C <sub>24</sub> H <sub>37</sub> N O <sub>5</sub> |                |
| Formula weight         | 419.55                                           |                |
| Temperature            | 296(2) K                                         |                |
| Wavelength             | 0.71073 Å                                        |                |
| Crystal system         | Monoclinic                                       |                |
| Space group            | P2(1)                                            |                |
| Unit cell dimensions   | a = 9.8535(3) Å                                  | = 90°.         |
|                        | b = 12.5734(4) Å                                 | = 103.496(2)°. |
|                        | c = 10.7133(3) Å                                 | = 90°.         |
| Volume                 | 1290.64(7) Å <sup>3</sup>                        |                |
| Z                      | 2                                                |                |
| Density (calculated)   | 1.080 Mg/m <sup>3</sup>                          |                |
| Absorption coefficient | 0.075 mm <sup>-1</sup>                           |                |

|                                   |                                             |
|-----------------------------------|---------------------------------------------|
| F(000)                            | 456                                         |
| Crystal size                      | 0.46 x 0.30 x 0.28 mm <sup>3</sup>          |
| Theta range for data collection   | 1.95 to 27.51°.                             |
| Index ranges                      | -12<=h<=12, -16<=k<=16, -13<=l<=13          |
| Reflections collected             | 16024                                       |
| Independent reflections           | 5730 [R(int) = 0.0363]                      |
| Completeness to theta = 27.51°    | 99.9 %                                      |
| Absorption correction             | Semi-empirical from equivalents             |
| Max. and min. transmission        | 0.745 and 0.628                             |
| Refinement method                 | Full-matrix least-squares on F <sup>2</sup> |
| Data / restraints / parameters    | 5730 / 13 / 294                             |
| Goodness-of-fit on F <sup>2</sup> | 1.003                                       |
| Final R indices [I>2sigma(I)]     | R1 = 0.0515, wR2 = 0.1232                   |
| R indices (all data)              | R1 = 0.0931, wR2 = 0.1471                   |
| Absolute structure parameter      | 1.2(12)                                     |
| Largest diff. peak and hole       | 0.216 and -0.175 e.Å <sup>-3</sup>          |

**Table S2.** Atomic coordinates (x 10<sup>4</sup>) and equivalent isotropic displacement parameters (Å<sup>2</sup>x 10<sup>3</sup>) for **2c**. U(eq) is defined as one third of the trace of the orthogonalized U<sup>ij</sup> tensor.

|      | x       | y       | z       | U(eq) |
|------|---------|---------|---------|-------|
| O(1) | 1953(2) | 5775(1) | 8321(1) | 91(1) |
| O(2) | 5122(1) | 5688(1) | 5370(1) | 89(1) |
| O(3) | 5662(1) | 4396(1) | 6855(1) | 67(1) |
| O(4) | 2061(1) | 5086(1) | 3737(1) | 79(1) |
| O(5) | 3624(1) | 4268(1) | 2835(1) | 64(1) |
| N(1) | 2109(1) | 5268(1) | 6349(1) | 50(1) |
| C(1) | 2182(1) | 4155(1) | 6531(1) | 43(1) |
| C(2) | 1445(2) | 3649(1) | 7313(2) | 50(1) |
| C(3) | 1465(2) | 2554(1) | 7473(2) | 54(1) |
| C(4) | 2271(2) | 1934(1) | 6829(2) | 61(1) |
| C(5) | 3013(2) | 2450(1) | 6061(2) | 55(1) |
| C(6) | 2995(2) | 3542(1) | 5884(1) | 46(1) |
| C(7) | 3892(2) | 4014(1) | 5051(1) | 52(1) |
| C(8) | 4959(2) | 4815(2) | 5762(2) | 59(1) |

|        |          |         |         |        |
|--------|----------|---------|---------|--------|
| C(9)   | 6798(2)  | 4961(2) | 7743(2) | 74(1)  |
| C(10)  | 6223(3)  | 5942(3) | 8227(3) | 125(1) |
| C(11)  | 7222(3)  | 4163(2) | 8816(2) | 112(1) |
| C(12)  | 7957(2)  | 5175(3) | 7082(3) | 134(1) |
| C(13)  | 3071(2)  | 4520(2) | 3815(1) | 58(1)  |
| C(14)  | 3069(2)  | 4725(2) | 1529(1) | 62(1)  |
| C(15)  | 3270(2)  | 5913(2) | 1591(2) | 81(1)  |
| C(16)  | 3981(2)  | 4202(2) | 757(2)  | 93(1)  |
| C(17)  | 1567(2)  | 4393(2) | 1032(2) | 82(1)  |
| C(18)  | 1956(2)  | 6017(1) | 7224(2) | 53(1)  |
| C(19)  | 1776(2)  | 7164(1) | 6768(2) | 58(1)  |
| C(20)  | 334(4)   | 7519(4) | 6734(5) | 89(1)  |
| C(21)  | 2854(6)  | 7793(6) | 7672(6) | 127(2) |
| C(22)  | 1980(6)  | 7333(4) | 5393(5) | 100(2) |
| C(20') | 571(7)   | 7229(5) | 5635(5) | 168(3) |
| C(21') | 1560(10) | 7809(5) | 7892(6) | 262(4) |
| C(22') | 3038(5)  | 7549(4) | 6338(8) | 215(4) |
| C(23)  | 626(2)   | 2045(2) | 8318(2) | 79(1)  |
| C(24)  | 2304(3)  | 747(2)  | 6941(3) | 93(1)  |

---

**Table S3.** Bond lengths [Å] and angles [°] for **2c**.

---

|              |            |
|--------------|------------|
| O(1)-C(18)   | 1.2155(19) |
| O(2)-C(8)    | 1.199(2)   |
| O(3)-C(8)    | 1.3228(19) |
| O(3)-C(9)    | 1.472(2)   |
| O(4)-C(13)   | 1.210(2)   |
| O(5)-C(13)   | 1.3284(19) |
| O(5)-C(14)   | 1.4933(18) |
| N(1)-C(18)   | 1.362(2)   |
| N(1)-C(1)    | 1.412(2)   |
| N(1)-H(1A)   | 0.8600     |
| C(1)-C(2)    | 1.386(2)   |
| C(1)-C(6)    | 1.405(2)   |
| C(2)-C(3)    | 1.387(2)   |
| C(2)-H(2A)   | 0.9300     |
| C(3)-C(4)    | 1.402(3)   |
| C(3)-C(23)   | 1.505(3)   |
| C(4)-C(5)    | 1.384(3)   |
| C(4)-C(24)   | 1.497(3)   |
| C(5)-C(6)    | 1.385(2)   |
| C(5)-H(5A)   | 0.9300     |
| C(6)-C(7)    | 1.516(2)   |
| C(7)-C(13)   | 1.521(2)   |
| C(7)-C(8)    | 1.525(2)   |
| C(7)-H(7A)   | 0.9800     |
| C(9)-C(10)   | 1.499(4)   |
| C(9)-C(12)   | 1.503(3)   |
| C(9)-C(11)   | 1.509(3)   |
| C(10)-H(10A) | 0.9600     |
| C(10)-H(10B) | 0.9600     |
| C(10)-H(10C) | 0.9600     |
| C(11)-H(11A) | 0.9600     |
| C(11)-H(11B) | 0.9600     |
| C(11)-H(11C) | 0.9600     |
| C(12)-H(12A) | 0.9600     |
| C(12)-H(12B) | 0.9600     |
| C(12)-H(12C) | 0.9600     |

|               |          |
|---------------|----------|
| C(14)-C(15)   | 1.506(3) |
| C(14)-C(16)   | 1.507(3) |
| C(14)-C(17)   | 1.510(3) |
| C(15)-H(15A)  | 0.9600   |
| C(15)-H(15B)  | 0.9600   |
| C(15)-H(15C)  | 0.9600   |
| C(16)-H(16A)  | 0.9600   |
| C(16)-H(16B)  | 0.9600   |
| C(16)-H(16C)  | 0.9600   |
| C(17)-H(17A)  | 0.9600   |
| C(17)-H(17B)  | 0.9600   |
| C(17)-H(17C)  | 0.9600   |
| C(18)-C(19)   | 1.520(2) |
| C(19)-C(20)   | 1.482(5) |
| C(19)-C(21)   | 1.487(6) |
| C(19)-C(20')  | 1.489(5) |
| C(19)-C(22')  | 1.503(5) |
| C(19)-C(21')  | 1.507(6) |
| C(19)-C(22)   | 1.547(5) |
| C(20)-H(20A)  | 0.9600   |
| C(20)-H(20B)  | 0.9600   |
| C(20)-H(20C)  | 0.9600   |
| C(21)-H(21A)  | 0.9600   |
| C(21)-H(21B)  | 0.9600   |
| C(21)-H(21C)  | 0.9600   |
| C(22)-H(22A)  | 0.9600   |
| C(22)-H(22B)  | 0.9600   |
| C(22)-H(22C)  | 0.9600   |
| C(20')-H(20D) | 0.9600   |
| C(20')-H(20E) | 0.9600   |
| C(20')-H(20F) | 0.9600   |
| C(21')-H(21D) | 0.9600   |
| C(21')-H(21E) | 0.9600   |
| C(21')-H(21F) | 0.9600   |
| C(22')-H(22D) | 0.9600   |
| C(22')-H(22E) | 0.9600   |
| C(22')-H(22F) | 0.9600   |
| C(23)-H(23A)  | 0.9600   |



|                  |            |
|------------------|------------|
| C(23)-H(23B)     | 0.9600     |
| C(23)-H(23C)     | 0.9600     |
| C(24)-H(24A)     | 0.9600     |
| C(24)-H(24B)     | 0.9600     |
| C(24)-H(24C)     | 0.9600     |
|                  |            |
| C(8)-O(3)-C(9)   | 122.81(15) |
| C(13)-O(5)-C(14) | 121.35(13) |
| C(18)-N(1)-C(1)  | 126.92(13) |
| C(18)-N(1)-H(1A) | 116.5      |
| C(1)-N(1)-H(1A)  | 116.5      |
| C(2)-C(1)-C(6)   | 119.09(14) |
| C(2)-C(1)-N(1)   | 121.43(14) |
| C(6)-C(1)-N(1)   | 119.46(13) |
| C(1)-C(2)-C(3)   | 122.40(15) |
| C(1)-C(2)-H(2A)  | 118.8      |
| C(3)-C(2)-H(2A)  | 118.8      |
| C(2)-C(3)-C(4)   | 118.99(16) |
| C(2)-C(3)-C(23)  | 120.12(17) |
| C(4)-C(3)-C(23)  | 120.88(17) |
| C(5)-C(4)-C(3)   | 118.05(16) |
| C(5)-C(4)-C(24)  | 120.67(18) |
| C(3)-C(4)-C(24)  | 121.26(18) |
| C(4)-C(5)-C(6)   | 123.67(16) |
| C(4)-C(5)-H(5A)  | 118.2      |
| C(6)-C(5)-H(5A)  | 118.2      |
| C(5)-C(6)-C(1)   | 117.79(15) |
| C(5)-C(6)-C(7)   | 118.57(14) |
| C(1)-C(6)-C(7)   | 123.60(14) |
| C(6)-C(7)-C(13)  | 114.31(13) |
| C(6)-C(7)-C(8)   | 113.13(12) |
| C(13)-C(7)-C(8)  | 108.90(15) |
| C(6)-C(7)-H(7A)  | 106.7      |
| C(13)-C(7)-H(7A) | 106.7      |
| C(8)-C(7)-H(7A)  | 106.7      |
| O(2)-C(8)-O(3)   | 126.12(16) |
| O(2)-C(8)-C(7)   | 124.22(14) |
| O(3)-C(8)-C(7)   | 109.66(16) |

|                     |            |
|---------------------|------------|
| O(3)-C(9)-C(10)     | 109.24(16) |
| O(3)-C(9)-C(12)     | 109.17(18) |
| C(10)-C(9)-C(12)    | 113.9(2)   |
| O(3)-C(9)-C(11)     | 101.86(18) |
| C(10)-C(9)-C(11)    | 110.1(2)   |
| C(12)-C(9)-C(11)    | 111.8(2)   |
| C(9)-C(10)-H(10A)   | 109.5      |
| C(9)-C(10)-H(10B)   | 109.5      |
| H(10A)-C(10)-H(10B) | 109.5      |
| C(9)-C(10)-H(10C)   | 109.5      |
| H(10A)-C(10)-H(10C) | 109.5      |
| H(10B)-C(10)-H(10C) | 109.5      |
| C(9)-C(11)-H(11A)   | 109.5      |
| C(9)-C(11)-H(11B)   | 109.5      |
| H(11A)-C(11)-H(11B) | 109.5      |
| C(9)-C(11)-H(11C)   | 109.5      |
| H(11A)-C(11)-H(11C) | 109.5      |
| H(11B)-C(11)-H(11C) | 109.5      |
| C(9)-C(12)-H(12A)   | 109.5      |
| C(9)-C(12)-H(12B)   | 109.5      |
| H(12A)-C(12)-H(12B) | 109.5      |
| C(9)-C(12)-H(12C)   | 109.5      |
| H(12A)-C(12)-H(12C) | 109.5      |
| H(12B)-C(12)-H(12C) | 109.5      |
| O(4)-C(13)-O(5)     | 124.63(14) |
| O(4)-C(13)-C(7)     | 124.58(15) |
| O(5)-C(13)-C(7)     | 110.79(14) |
| O(5)-C(14)-C(15)    | 108.95(14) |
| O(5)-C(14)-C(16)    | 102.23(14) |
| C(15)-C(14)-C(16)   | 111.53(18) |
| O(5)-C(14)-C(17)    | 109.79(15) |
| C(15)-C(14)-C(17)   | 113.47(17) |
| C(16)-C(14)-C(17)   | 110.26(16) |
| C(14)-C(15)-H(15A)  | 109.5      |
| C(14)-C(15)-H(15B)  | 109.5      |
| H(15A)-C(15)-H(15B) | 109.5      |
| C(14)-C(15)-H(15C)  | 109.5      |
| H(15A)-C(15)-H(15C) | 109.5      |

|                     |            |
|---------------------|------------|
| H(15B)-C(15)-H(15C) | 109.5      |
| C(14)-C(16)-H(16A)  | 109.5      |
| C(14)-C(16)-H(16B)  | 109.5      |
| H(16A)-C(16)-H(16B) | 109.5      |
| C(14)-C(16)-H(16C)  | 109.5      |
| H(16A)-C(16)-H(16C) | 109.5      |
| H(16B)-C(16)-H(16C) | 109.5      |
| C(14)-C(17)-H(17A)  | 109.5      |
| C(14)-C(17)-H(17B)  | 109.5      |
| H(17A)-C(17)-H(17B) | 109.5      |
| C(14)-C(17)-H(17C)  | 109.5      |
| H(17A)-C(17)-H(17C) | 109.5      |
| H(17B)-C(17)-H(17C) | 109.5      |
| O(1)-C(18)-N(1)     | 121.21(16) |
| O(1)-C(18)-C(19)    | 121.47(16) |
| N(1)-C(18)-C(19)    | 117.32(14) |
| C(20)-C(19)-C(21)   | 113.0(4)   |
| C(20)-C(19)-C(20')  | 52.1(3)    |
| C(21)-C(19)-C(20')  | 144.5(4)   |
| C(20)-C(19)-C(22')  | 138.8(3)   |
| C(21)-C(19)-C(22')  | 60.8(4)    |
| C(20')-C(19)-C(22') | 107.0(4)   |
| C(20)-C(19)-C(21')  | 62.9(4)    |
| C(21)-C(19)-C(21')  | 53.6(4)    |
| C(20')-C(19)-C(21') | 112.8(4)   |
| C(22')-C(19)-C(21') | 110.6(4)   |
| C(20)-C(19)-C(18)   | 109.5(2)   |
| C(21)-C(19)-C(18)   | 106.4(3)   |
| C(20')-C(19)-C(18)  | 109.0(2)   |
| C(22')-C(19)-C(18)  | 111.1(2)   |
| C(21')-C(19)-C(18)  | 106.3(3)   |
| C(20)-C(19)-C(22)   | 105.8(3)   |
| C(21)-C(19)-C(22)   | 108.4(4)   |
| C(20')-C(19)-C(22)  | 58.2(3)    |
| C(22')-C(19)-C(22)  | 50.5(3)    |
| C(21')-C(19)-C(22)  | 139.5(3)   |
| C(18)-C(19)-C(22)   | 113.9(2)   |
| C(19)-C(20)-H(20A)  | 109.5      |

|                      |       |
|----------------------|-------|
| C(19)-C(20)-H(20B)   | 109.5 |
| H(20A)-C(20)-H(20B)  | 109.5 |
| C(19)-C(20)-H(20C)   | 109.5 |
| H(20A)-C(20)-H(20C)  | 109.5 |
| H(20B)-C(20)-H(20C)  | 109.5 |
| C(19)-C(21)-H(21A)   | 109.5 |
| C(19)-C(21)-H(21B)   | 109.5 |
| H(21A)-C(21)-H(21B)  | 109.5 |
| C(19)-C(21)-H(21C)   | 109.5 |
| H(21A)-C(21)-H(21C)  | 109.5 |
| H(21B)-C(21)-H(21C)  | 109.5 |
| C(19)-C(22)-H(22A)   | 109.5 |
| C(19)-C(22)-H(22B)   | 109.5 |
| H(22A)-C(22)-H(22B)  | 109.5 |
| C(19)-C(22)-H(22C)   | 109.5 |
| H(22A)-C(22)-H(22C)  | 109.5 |
| H(22B)-C(22)-H(22C)  | 109.5 |
| C(19)-C(20')-H(20D)  | 109.4 |
| C(19)-C(20')-H(20E)  | 109.5 |
| H(20D)-C(20')-H(20E) | 109.5 |
| C(19)-C(20')-H(20F)  | 109.5 |
| H(20D)-C(20')-H(20F) | 109.5 |
| H(20E)-C(20')-H(20F) | 109.5 |
| C(19)-C(21')-H(21D)  | 109.5 |
| C(19)-C(21')-H(21E)  | 109.5 |
| H(21D)-C(21')-H(21E) | 109.5 |
| C(19)-C(21')-H(21F)  | 109.4 |
| H(21D)-C(21')-H(21F) | 109.5 |
| H(21E)-C(21')-H(21F) | 109.5 |
| C(19)-C(22')-H(22D)  | 109.5 |
| C(19)-C(22')-H(22E)  | 109.5 |
| H(22D)-C(22')-H(22E) | 109.5 |
| C(19)-C(22')-H(22F)  | 109.5 |
| H(22D)-C(22')-H(22F) | 109.5 |
| H(22E)-C(22')-H(22F) | 109.5 |
| C(3)-C(23)-H(23A)    | 109.5 |
| C(3)-C(23)-H(23B)    | 109.5 |
| H(23A)-C(23)-H(23B)  | 109.5 |

|                     |       |
|---------------------|-------|
| C(3)-C(23)-H(23C)   | 109.5 |
| H(23A)-C(23)-H(23C) | 109.5 |
| H(23B)-C(23)-H(23C) | 109.5 |
| C(4)-C(24)-H(24A)   | 109.5 |
| C(4)-C(24)-H(24B)   | 109.5 |
| H(24A)-C(24)-H(24B) | 109.5 |
| C(4)-C(24)-H(24C)   | 109.5 |
| H(24A)-C(24)-H(24C) | 109.5 |
| H(24B)-C(24)-H(24C) | 109.5 |

---

Symmetry transformations used to generate equivalent atoms:

**Table S4.** Anisotropic displacement parameters ( $\text{\AA}^2 \times 10^3$ ) for **2c**. The anisotropic displacement factor exponent takes the form:  $-2^2 [ h^2 a^* 2U^{11} + \dots + 2 h k a^* b^* U^{12} ]$

|        | U <sup>11</sup> | U <sup>22</sup> | U <sup>33</sup> | U <sup>23</sup> | U <sup>13</sup> | U <sup>12</sup> |
|--------|-----------------|-----------------|-----------------|-----------------|-----------------|-----------------|
| O(1)   | 173(1)          | 54(1)           | 47(1)           | -1(1)           | 28(1)           | 7(1)            |
| O(2)   | 79(1)           | 88(1)           | 94(1)           | 42(1)           | 7(1)            | -19(1)          |
| O(3)   | 57(1)           | 73(1)           | 63(1)           | 17(1)           | 0(1)            | -6(1)           |
| O(4)   | 81(1)           | 110(1)          | 48(1)           | 9(1)            | 18(1)           | 41(1)           |
| O(5)   | 71(1)           | 81(1)           | 44(1)           | 9(1)            | 20(1)           | 19(1)           |
| N(1)   | 70(1)           | 37(1)           | 47(1)           | 3(1)            | 20(1)           | 0(1)            |
| C(1)   | 47(1)           | 37(1)           | 44(1)           | 0(1)            | 7(1)            | -1(1)           |
| C(2)   | 52(1)           | 46(1)           | 55(1)           | 0(1)            | 17(1)           | -4(1)           |
| C(3)   | 52(1)           | 48(1)           | 60(1)           | 6(1)            | 8(1)            | -8(1)           |
| C(4)   | 67(1)           | 37(1)           | 73(1)           | 2(1)            | 7(1)            | 0(1)            |
| C(5)   | 56(1)           | 49(1)           | 58(1)           | -4(1)           | 10(1)           | 7(1)            |
| C(6)   | 48(1)           | 44(1)           | 45(1)           | 0(1)            | 9(1)            | 2(1)            |
| C(7)   | 55(1)           | 58(1)           | 46(1)           | 5(1)            | 16(1)           | 7(1)            |
| C(8)   | 47(1)           | 73(1)           | 59(1)           | 17(1)           | 15(1)           | 2(1)            |
| C(9)   | 54(1)           | 81(1)           | 78(1)           | 4(1)            | -4(1)           | -3(1)           |
| C(10)  | 113(2)          | 113(2)          | 126(2)          | -32(2)          | -23(2)          | 16(2)           |
| C(11)  | 106(2)          | 120(2)          | 88(1)           | 27(2)           | -26(1)          | -7(2)           |
| C(12)  | 54(1)           | 197(3)          | 145(2)          | 29(2)           | 10(1)           | -25(2)          |
| C(13)  | 59(1)           | 68(1)           | 48(1)           | 0(1)            | 17(1)           | 10(1)           |
| C(14)  | 68(1)           | 76(1)           | 45(1)           | 10(1)           | 15(1)           | 14(1)           |
| C(15)  | 91(1)           | 82(2)           | 68(1)           | 20(1)           | 14(1)           | 2(1)            |
| C(16)  | 103(1)          | 128(2)          | 56(1)           | 18(1)           | 35(1)           | 39(1)           |
| C(17)  | 78(1)           | 107(2)          | 58(1)           | 6(1)            | 11(1)           | -2(1)           |
| C(18)  | 61(1)           | 44(1)           | 51(1)           | -2(1)           | 9(1)            | 1(1)            |
| C(19)  | 64(1)           | 40(1)           | 67(1)           | 2(1)            | 9(1)            | 3(1)            |
| C(20)  | 81(3)           | 81(3)           | 102             | 40(3)           | 17(2)           | 28(2)           |
| C(21)  | 100(4)          | 148             | 111(4)          | -35(4)          | -21(4)          | -19(4)          |
| C(22)  | 122             | 54(3)           | 141(4)          | 40(3)           | 65(3)           | 12(3)           |
| C(20') | 234(6)          | 88(4)           | 120             | 27(3)           | -81(4)          | 9(4)            |
| C(21') | 588(11)         | 106             | 154(4)          | 39(3)           | 212(6)          | 142(5)          |
| C(22') | 113(3)          | 68(3)           | 495(11)         | 120(4)          | 138(5)          | 20(3)           |
| C(23)  | 82(1)           | 67(1)           | 94(1)           | 10(1)           | 31(1)           | -15(1)          |
| C(24)  | 114(2)          | 44(1)           | 124(2)          | 8(1)            | 31(1)           | 9(1)            |

**Table S5.** Hydrogen coordinates ( $\times 10^4$ ) and isotropic displacement parameters ( $\text{\AA}^2 \times 10^3$ ) for **2c**.

|        | x    | y    | z    | U(eq) |
|--------|------|------|------|-------|
| H(1A)  | 2166 | 5496 | 5606 | 60    |
| H(2A)  | 916  | 4058 | 7747 | 60    |
| H(5A)  | 3554 | 2041 | 5639 | 66    |
| H(7A)  | 4422 | 3425 | 4800 | 63    |
| H(10A) | 5963 | 6446 | 7539 | 188   |
| H(10B) | 6921 | 6250 | 8908 | 188   |
| H(10C) | 5418 | 5759 | 8542 | 188   |
| H(11A) | 6458 | 4047 | 9215 | 169   |
| H(11B) | 8010 | 4431 | 9441 | 169   |
| H(11C) | 7469 | 3504 | 8475 | 169   |
| H(12A) | 7646 | 5677 | 6400 | 201   |
| H(12B) | 8219 | 4523 | 6734 | 201   |
| H(12C) | 8748 | 5460 | 7689 | 201   |
| H(15A) | 2672 | 6221 | 2083 | 122   |
| H(15B) | 3043 | 6201 | 738  | 122   |
| H(15C) | 4225 | 6073 | 1992 | 122   |
| H(16A) | 4930 | 4427 | 1074 | 139   |
| H(16B) | 3668 | 4403 | -128 | 139   |
| H(16C) | 3925 | 3444 | 833  | 139   |
| H(17A) | 994  | 4745 | 1517 | 122   |
| H(17B) | 1489 | 3637 | 1119 | 122   |
| H(17C) | 1263 | 4586 | 143  | 122   |
| H(20A) | 159  | 7456 | 7576 | 133   |
| H(20B) | -317 | 7084 | 6144 | 133   |
| H(20C) | 224  | 8248 | 6461 | 133   |
| H(21A) | 2766 | 7674 | 8535 | 191   |
| H(21B) | 2726 | 8535 | 7469 | 191   |
| H(21C) | 3765 | 7576 | 7596 | 191   |
| H(22A) | 1960 | 6658 | 4971 | 150   |
| H(22B) | 2863 | 7672 | 5435 | 150   |
| H(22C) | 1244 | 7776 | 4919 | 150   |
| H(20D) | -284 | 7150 | 5911 | 251   |

|        |      |      |      |     |
|--------|------|------|------|-----|
| H(20E) | 641  | 6673 | 5040 | 251 |
| H(20F) | 577  | 7907 | 5225 | 251 |
| H(21D) | 1492 | 7340 | 8582 | 394 |
| H(21E) | 715  | 8215 | 7637 | 394 |
| H(21F) | 2336 | 8282 | 8172 | 394 |
| H(22D) | 3783 | 7684 | 7076 | 322 |
| H(22E) | 2812 | 8193 | 5853 | 322 |
| H(22F) | 3325 | 7016 | 5812 | 322 |
| H(23A) | 152  | 2587 | 8685 | 119 |
| H(23B) | 1237 | 1656 | 8993 | 119 |
| H(23C) | -47  | 1569 | 7817 | 119 |
| H(24A) | 2898 | 461  | 6430 | 140 |
| H(24B) | 1377 | 470  | 6642 | 140 |
| H(24C) | 2658 | 549  | 7822 | 140 |

---



**Table S6.** Torsion angles [°] for **2c**.

---

|                       |             |
|-----------------------|-------------|
| C(18)-N(1)-C(1)-C(2)  | 33.4(2)     |
| C(18)-N(1)-C(1)-C(6)  | -148.04(15) |
| C(6)-C(1)-C(2)-C(3)   | -0.7(2)     |
| N(1)-C(1)-C(2)-C(3)   | 177.83(13)  |
| C(1)-C(2)-C(3)-C(4)   | 0.6(2)      |
| C(1)-C(2)-C(3)-C(23)  | -179.06(14) |
| C(2)-C(3)-C(4)-C(5)   | 0.0(2)      |
| C(23)-C(3)-C(4)-C(5)  | 179.67(15)  |
| C(2)-C(3)-C(4)-C(24)  | -178.48(17) |
| C(23)-C(3)-C(4)-C(24) | 1.1(3)      |
| C(3)-C(4)-C(5)-C(6)   | -0.5(2)     |
| C(24)-C(4)-C(5)-C(6)  | 178.00(17)  |
| C(4)-C(5)-C(6)-C(1)   | 0.4(2)      |
| C(4)-C(5)-C(6)-C(7)   | 178.05(14)  |
| C(2)-C(1)-C(6)-C(5)   | 0.21(19)    |
| N(1)-C(1)-C(6)-C(5)   | -178.35(12) |
| C(2)-C(1)-C(6)-C(7)   | -177.30(13) |
| N(1)-C(1)-C(6)-C(7)   | 4.1(2)      |
| C(5)-C(6)-C(7)-C(13)  | 113.85(16)  |
| C(1)-C(6)-C(7)-C(13)  | -68.66(19)  |
| C(5)-C(6)-C(7)-C(8)   | -120.74(16) |
| C(1)-C(6)-C(7)-C(8)   | 56.75(19)   |
| C(9)-O(3)-C(8)-O(2)   | -1.6(3)     |
| C(9)-O(3)-C(8)-C(7)   | 178.17(15)  |
| C(6)-C(7)-C(8)-O(2)   | -129.86(18) |
| C(13)-C(7)-C(8)-O(2)  | -1.6(2)     |
| C(6)-C(7)-C(8)-O(3)   | 50.34(19)   |
| C(13)-C(7)-C(8)-O(3)  | 178.61(13)  |
| C(8)-O(3)-C(9)-C(10)  | 62.8(2)     |
| C(8)-O(3)-C(9)-C(12)  | -62.4(2)    |
| C(8)-O(3)-C(9)-C(11)  | 179.21(17)  |
| C(14)-O(5)-C(13)-O(4) | 3.4(3)      |
| C(14)-O(5)-C(13)-C(7) | -175.76(14) |
| C(6)-C(7)-C(13)-O(4)  | 43.3(2)     |
| C(8)-C(7)-C(13)-O(4)  | -84.3(2)    |
| C(6)-C(7)-C(13)-O(5)  | -137.52(15) |

|                         |             |
|-------------------------|-------------|
| C(8)-C(7)-C(13)-O(5)    | 94.88(17)   |
| C(13)-O(5)-C(14)-C(15)  | 63.1(2)     |
| C(13)-O(5)-C(14)-C(16)  | -178.81(17) |
| C(13)-O(5)-C(14)-C(17)  | -61.8(2)    |
| C(1)-N(1)-C(18)-O(1)    | 4.6(3)      |
| C(1)-N(1)-C(18)-C(19)   | -174.78(13) |
| O(1)-C(18)-C(19)-C(20)  | -68.5(3)    |
| N(1)-C(18)-C(19)-C(20)  | 110.9(3)    |
| O(1)-C(18)-C(19)-C(21)  | 53.9(3)     |
| N(1)-C(18)-C(19)-C(21)  | -126.7(3)   |
| O(1)-C(18)-C(19)-C(20') | -124.0(3)   |
| N(1)-C(18)-C(19)-C(20') | 55.4(4)     |
| O(1)-C(18)-C(19)-C(22') | 118.3(4)    |
| N(1)-C(18)-C(19)-C(22') | -62.3(4)    |
| O(1)-C(18)-C(19)-C(21') | -2.1(4)     |
| N(1)-C(18)-C(19)-C(21') | 177.3(4)    |
| O(1)-C(18)-C(19)-C(22)  | 173.2(3)    |
| N(1)-C(18)-C(19)-C(22)  | -7.4(3)     |

---

Symmetry transformations used to generate equivalent atoms:

**Table S7.** Hydrogen bonds for **2c** [Å and °].

| D-H...A           | d(D-H) | d(H...A) | d(D...A)   | <(DHA) |
|-------------------|--------|----------|------------|--------|
| N(1)-H(1A)...O(4) | 0.86   | 2.05     | 2.7968(17) | 145.2  |

---

Symmetry transformations used to generate equivalent atoms:
